# Supplementary material for: Development of a Telescoped Flow Process for the Safe and Effective Generation of Propargylic Amines
Source: MDPI journal article supplement (doi:10.3390/molecules24203658), 2019-10-10

# Supporting Information

## Development of a Telescoped Flow Process for the Safe and Effective Generation of Propargylic Amines

Kian Donnelly,<sup>a</sup> Huan Zhang,<sup>a</sup> Marcus Baumann<sup>\*a</sup>

<sup>a</sup> School of Chemistry, University College Dublin, Science Centre South, Belfield, Dublin 4, Ireland

email: marcus.baumann@ucd.ie

### Table of contents:

Copies of NMR spectra

SI 2

## Copies of NMR Spectra

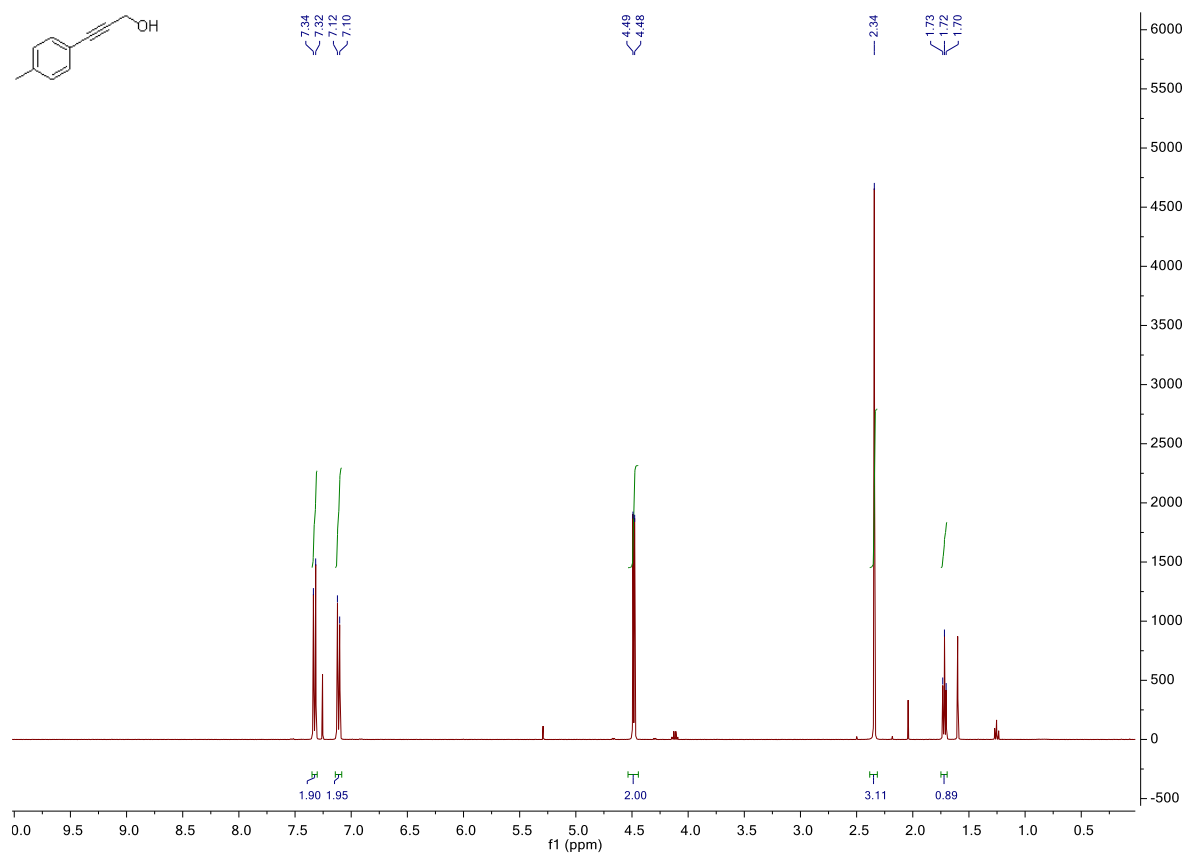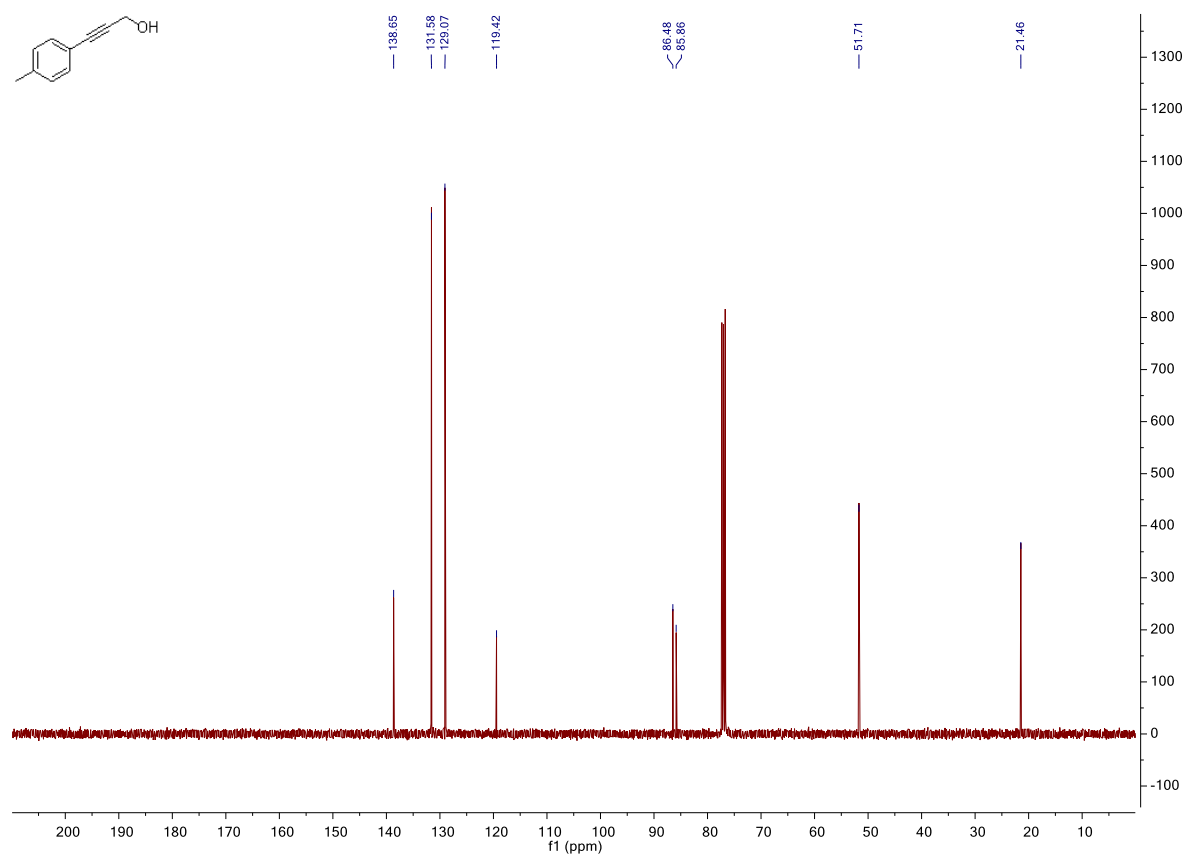

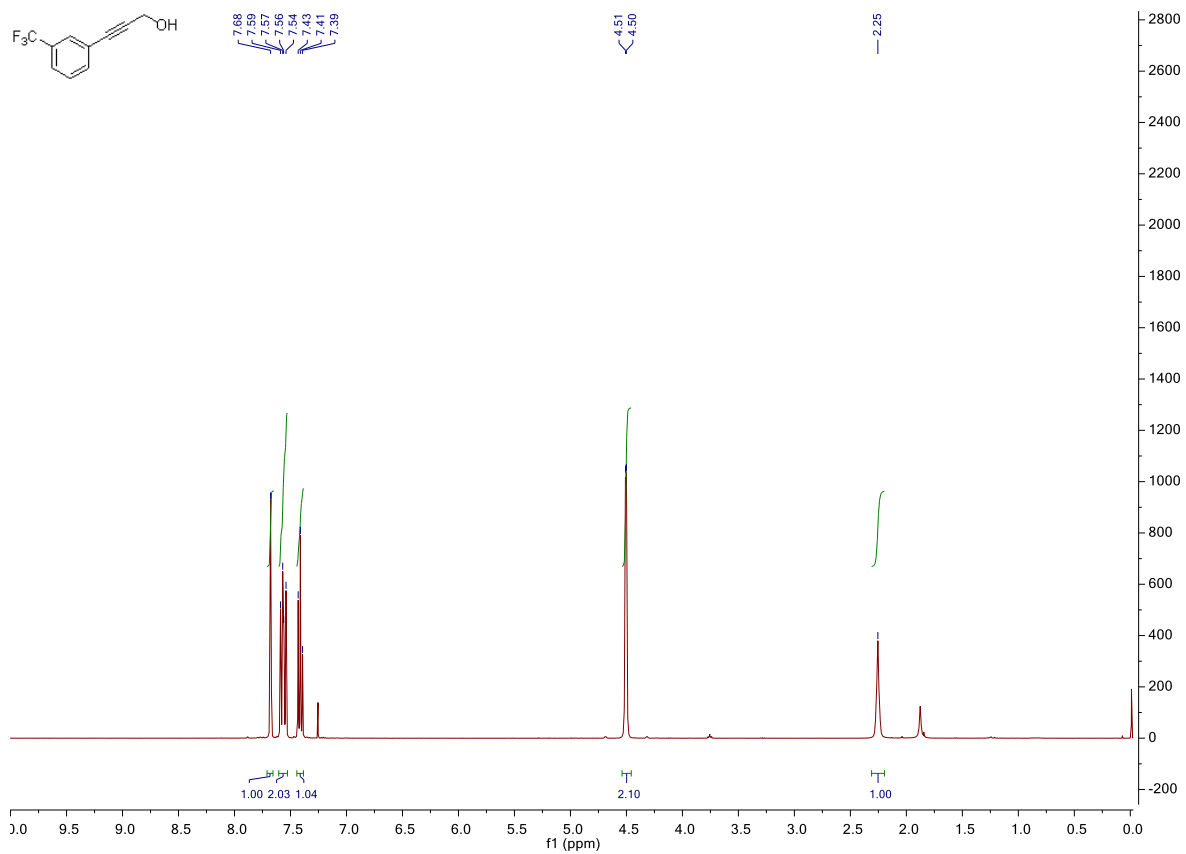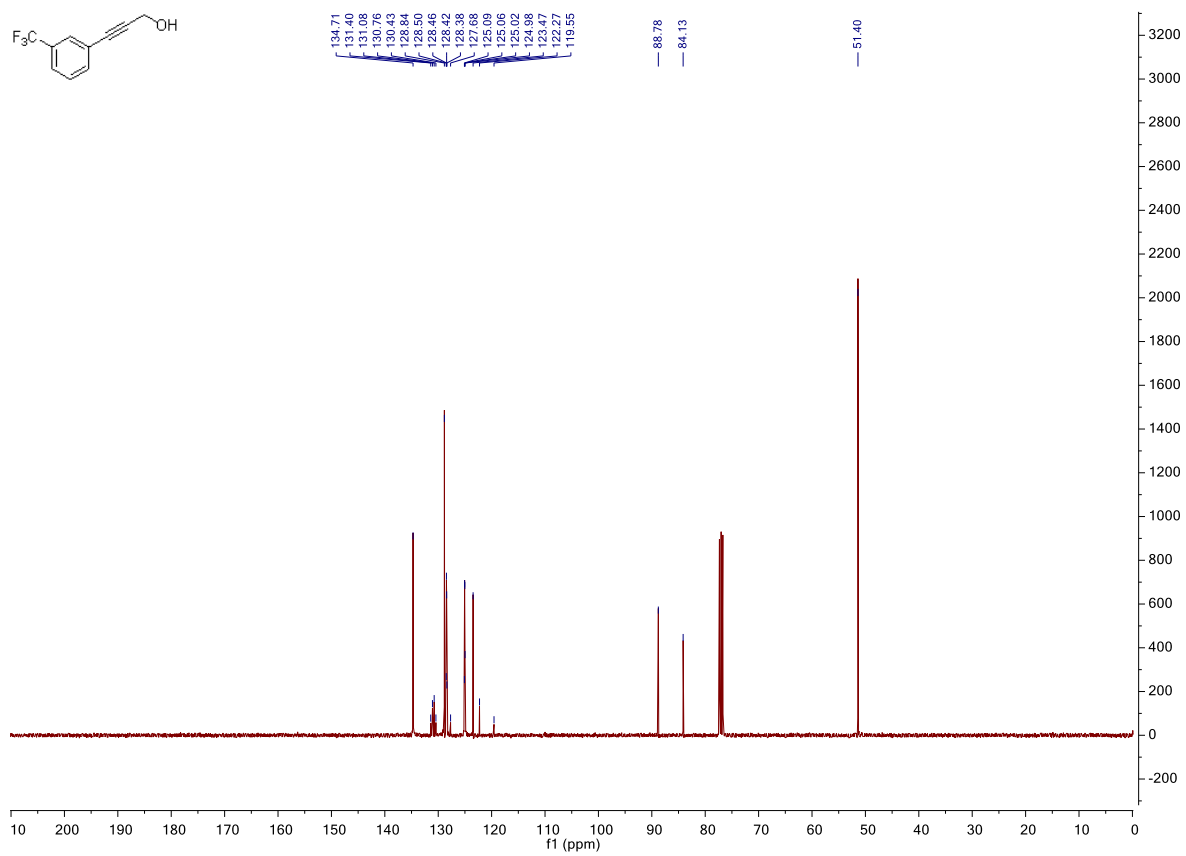

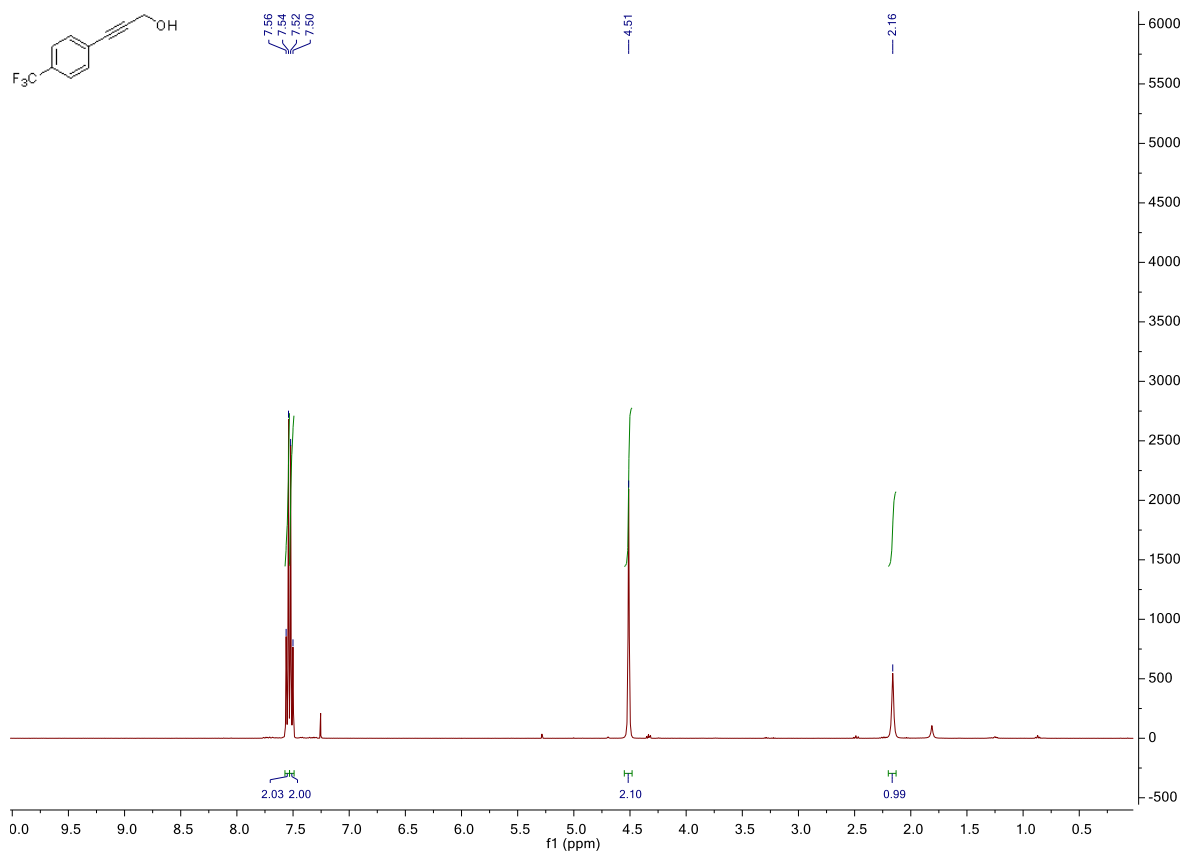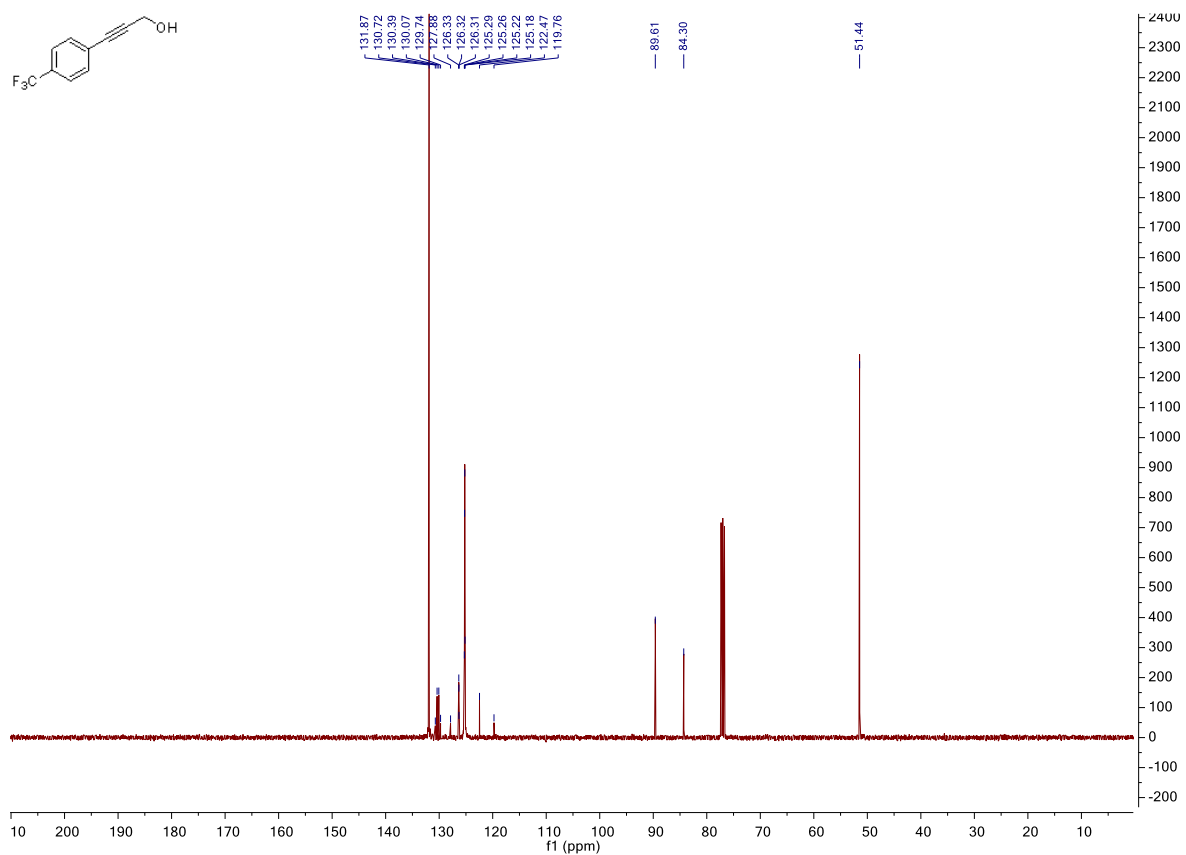

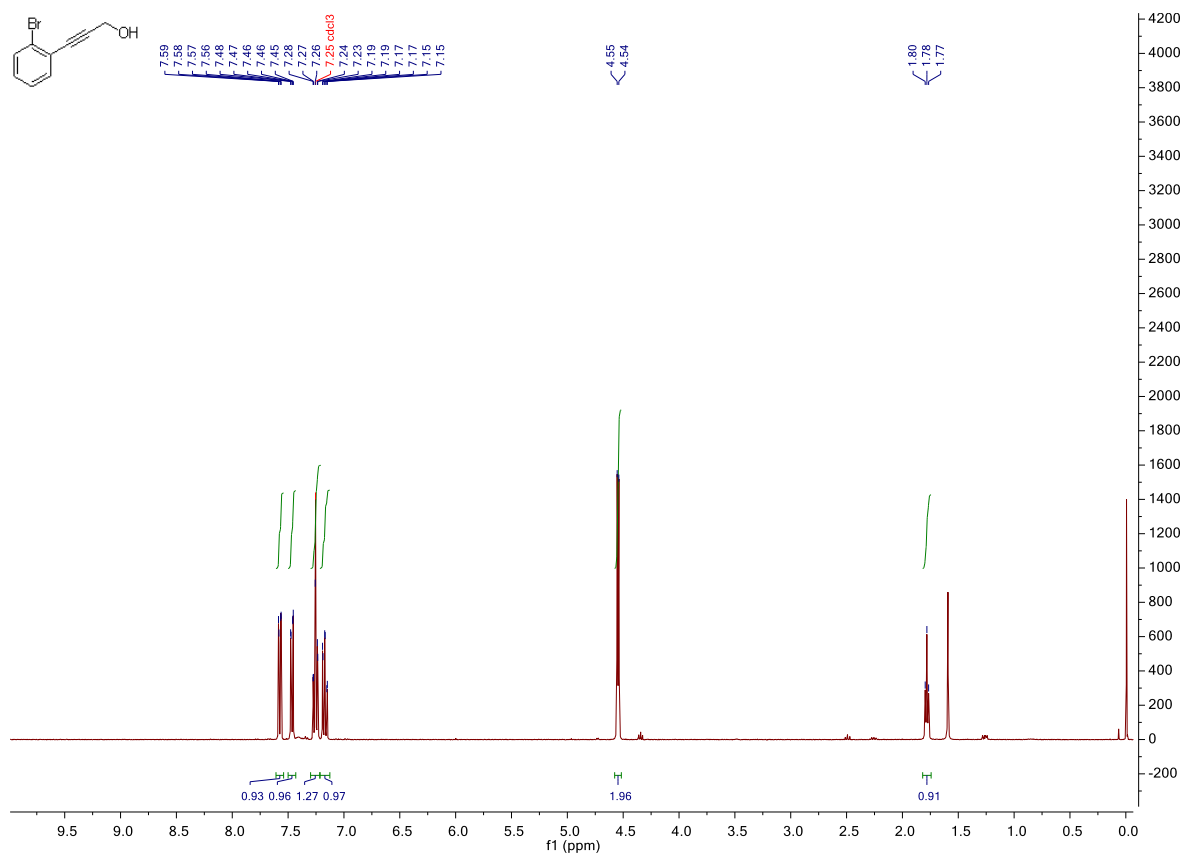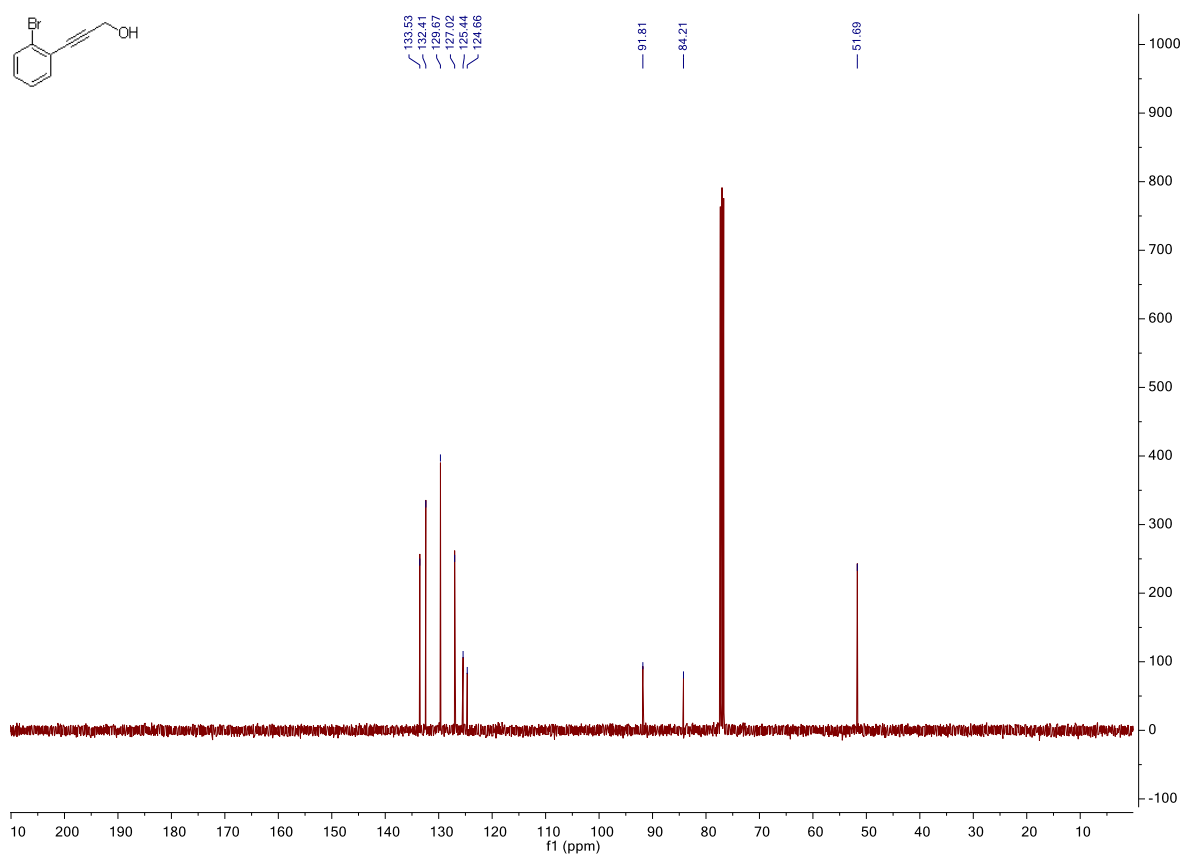

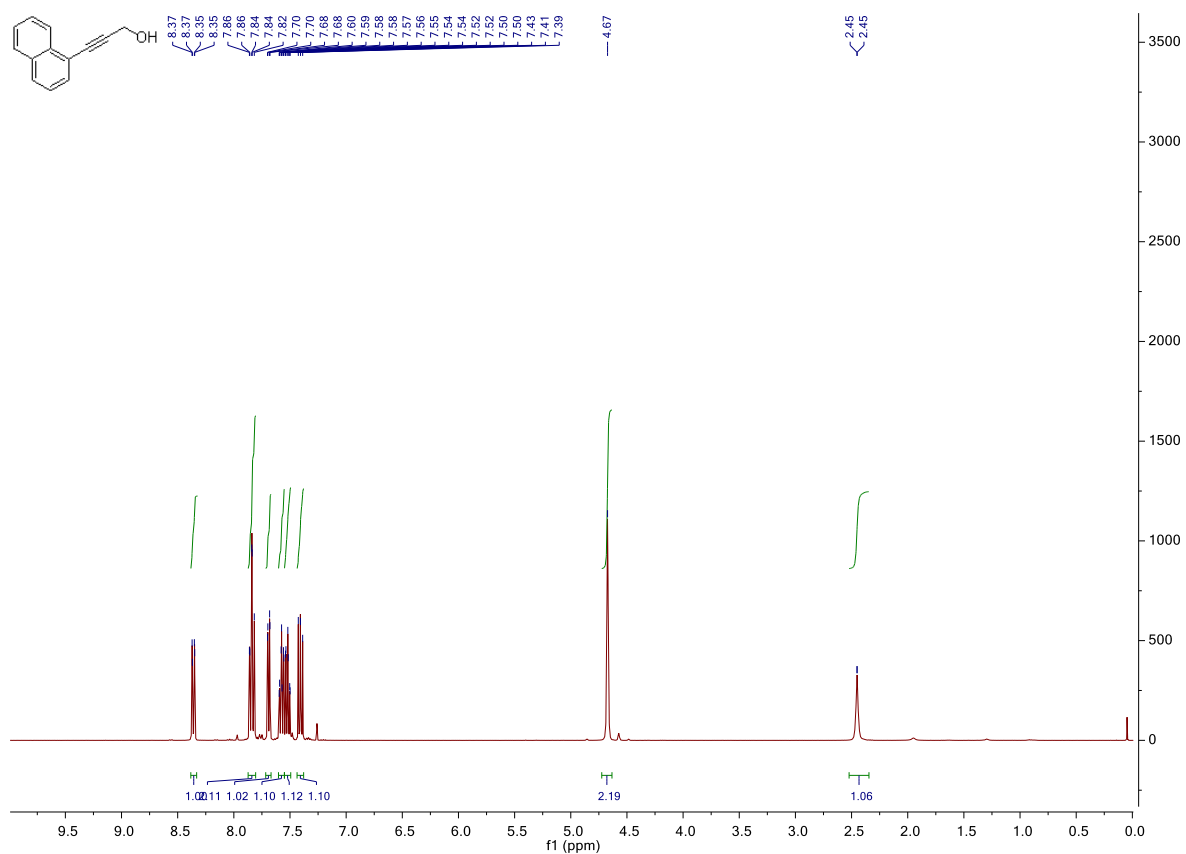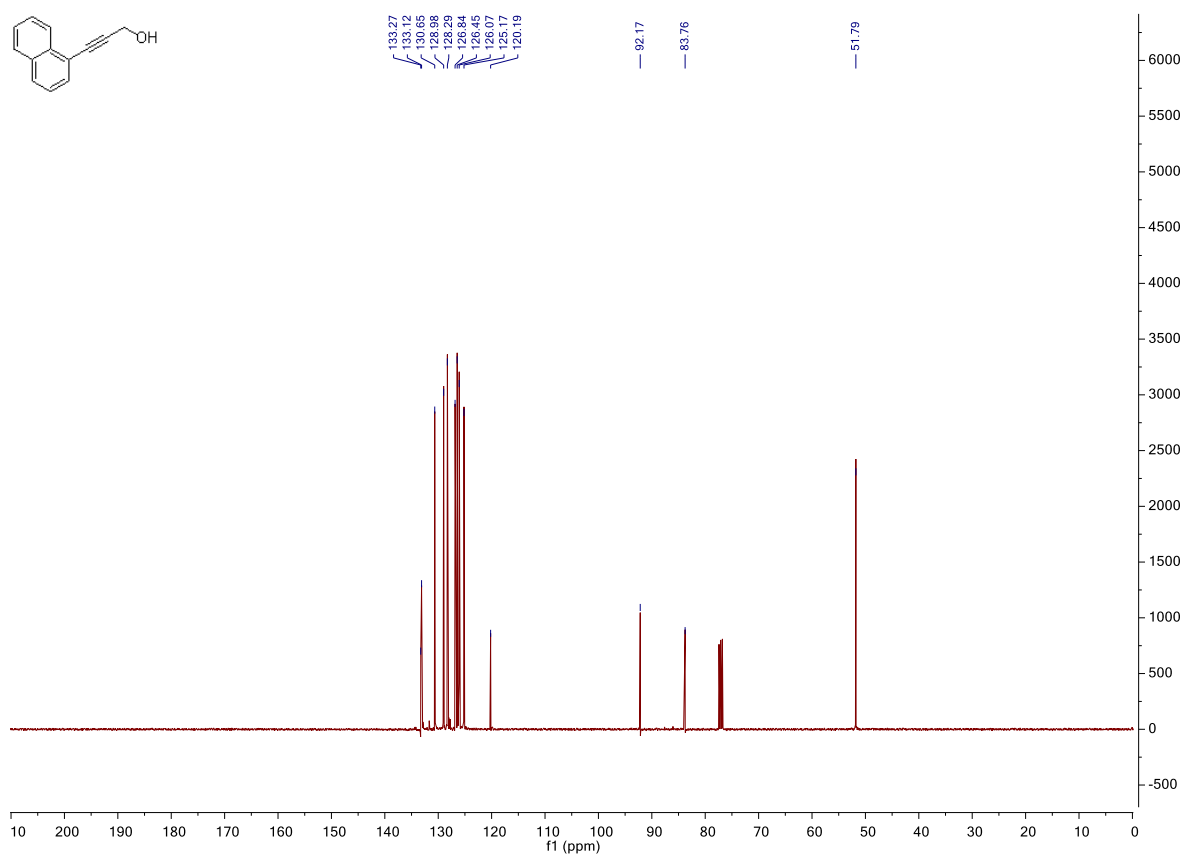

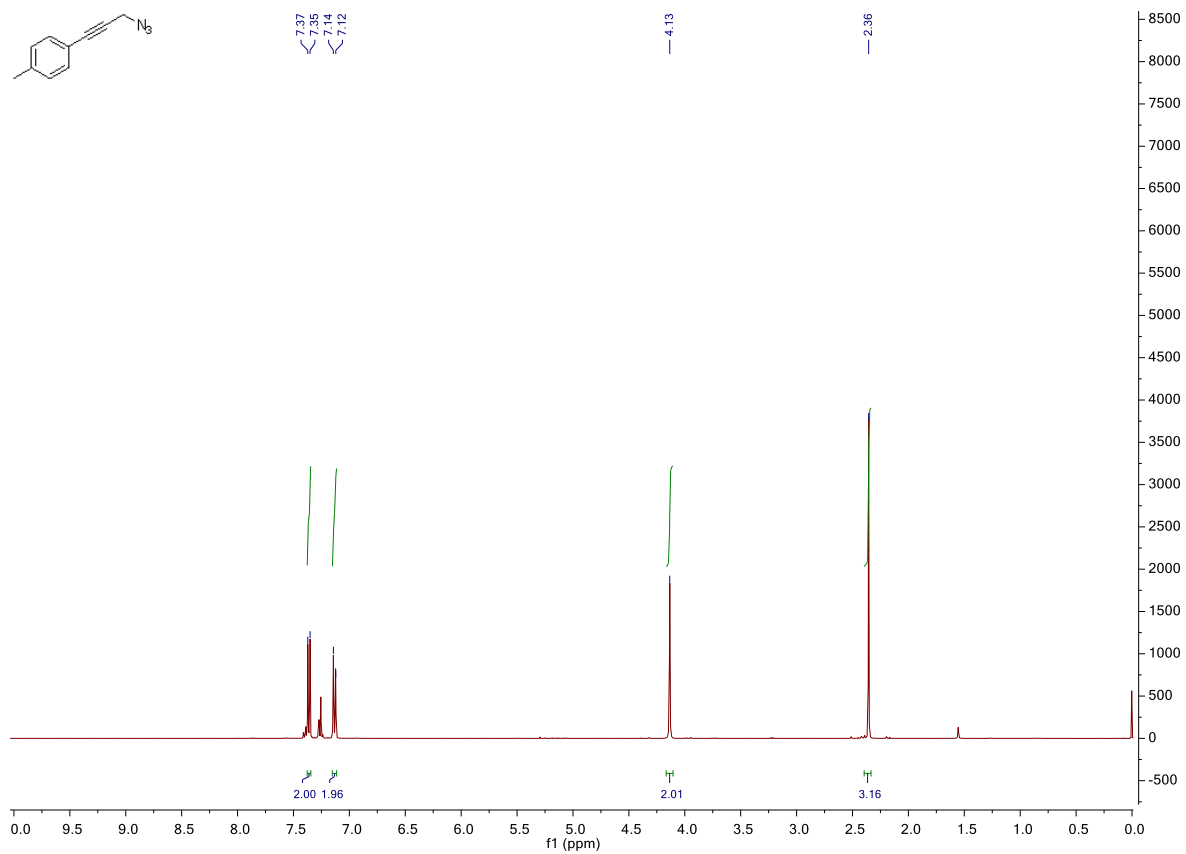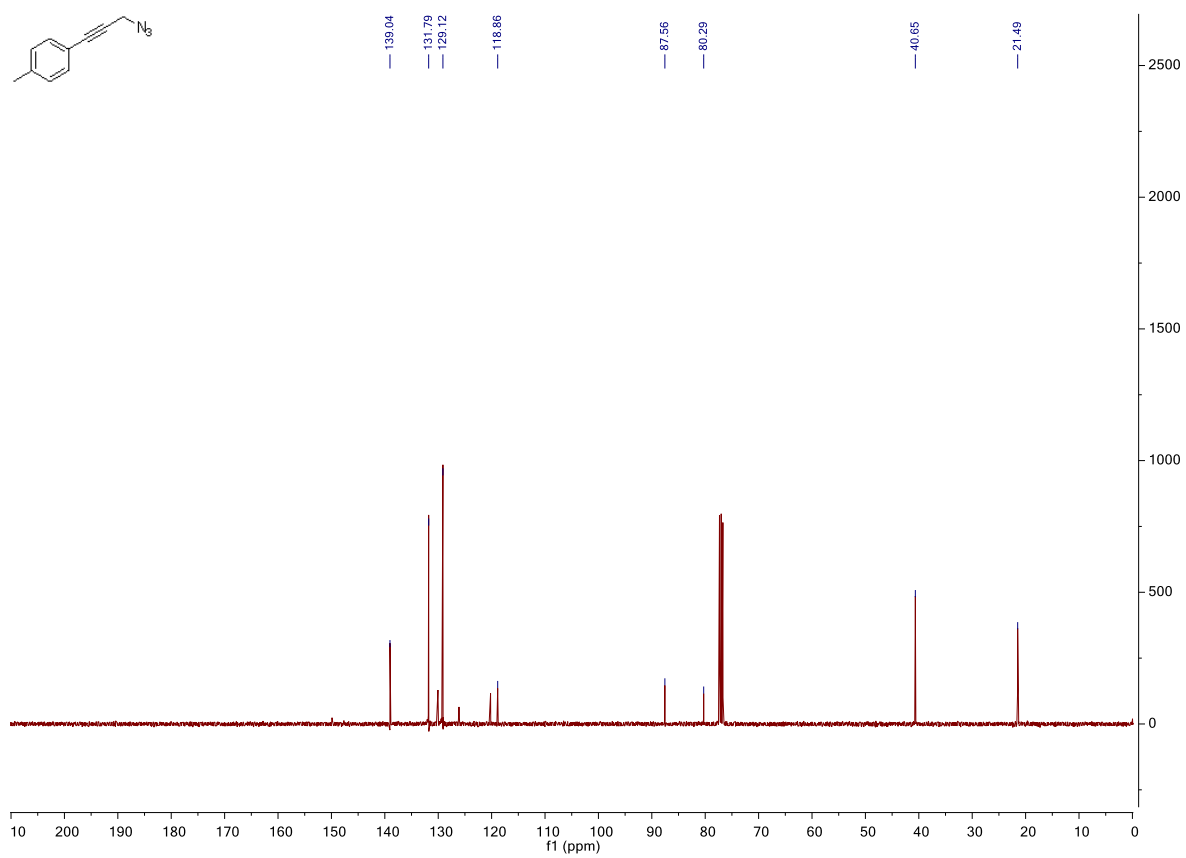

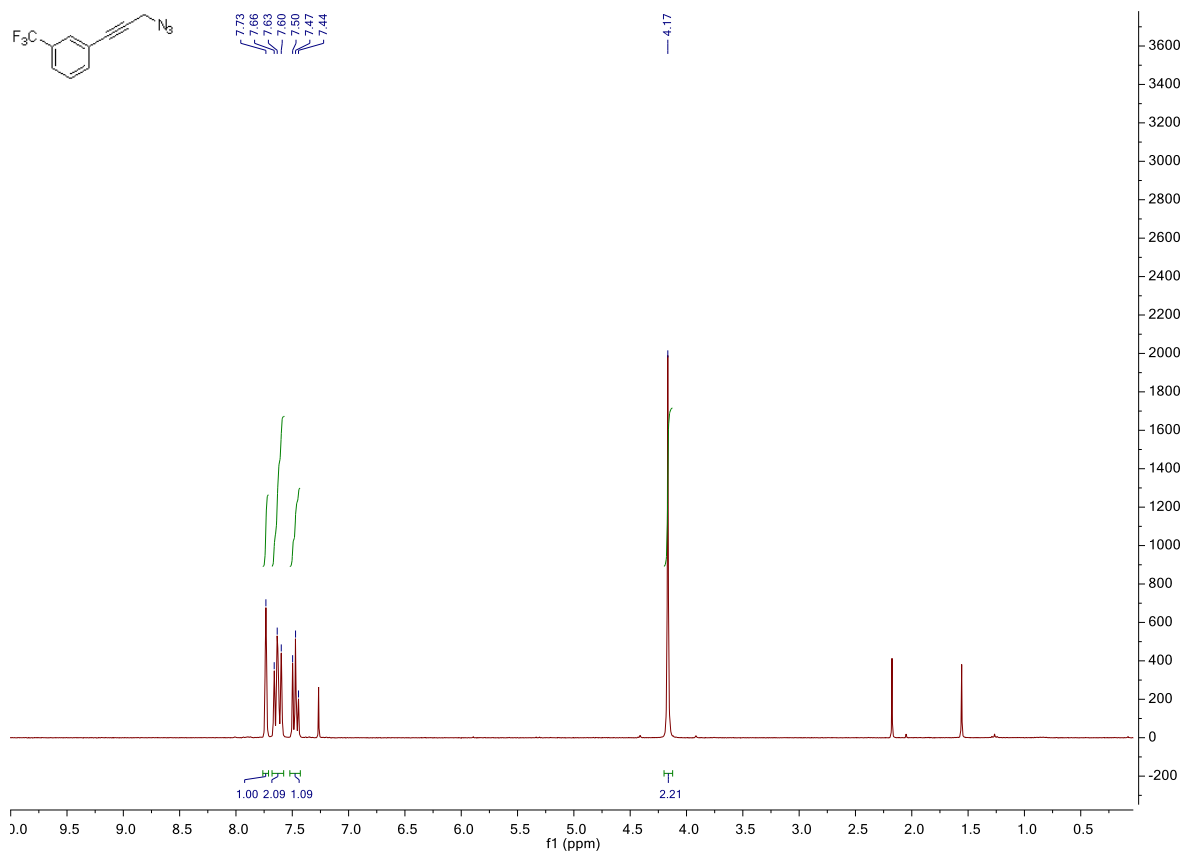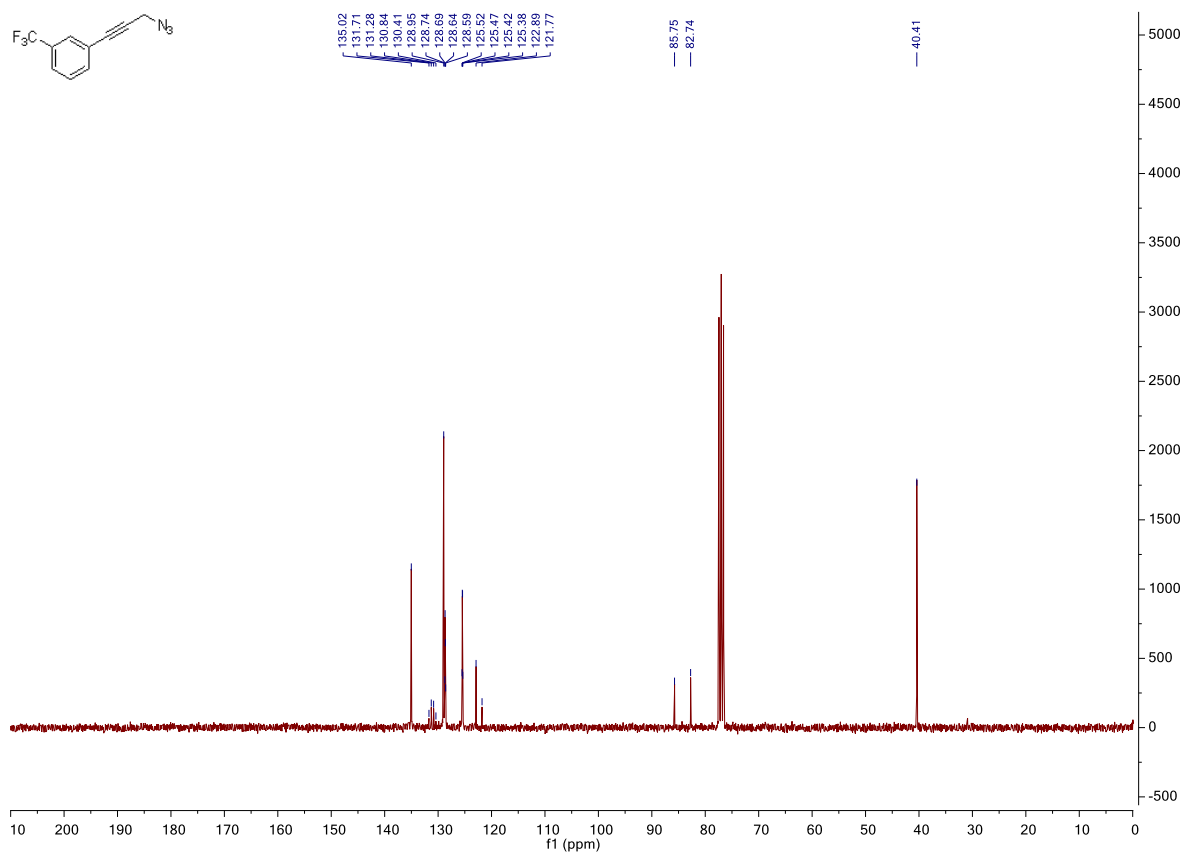



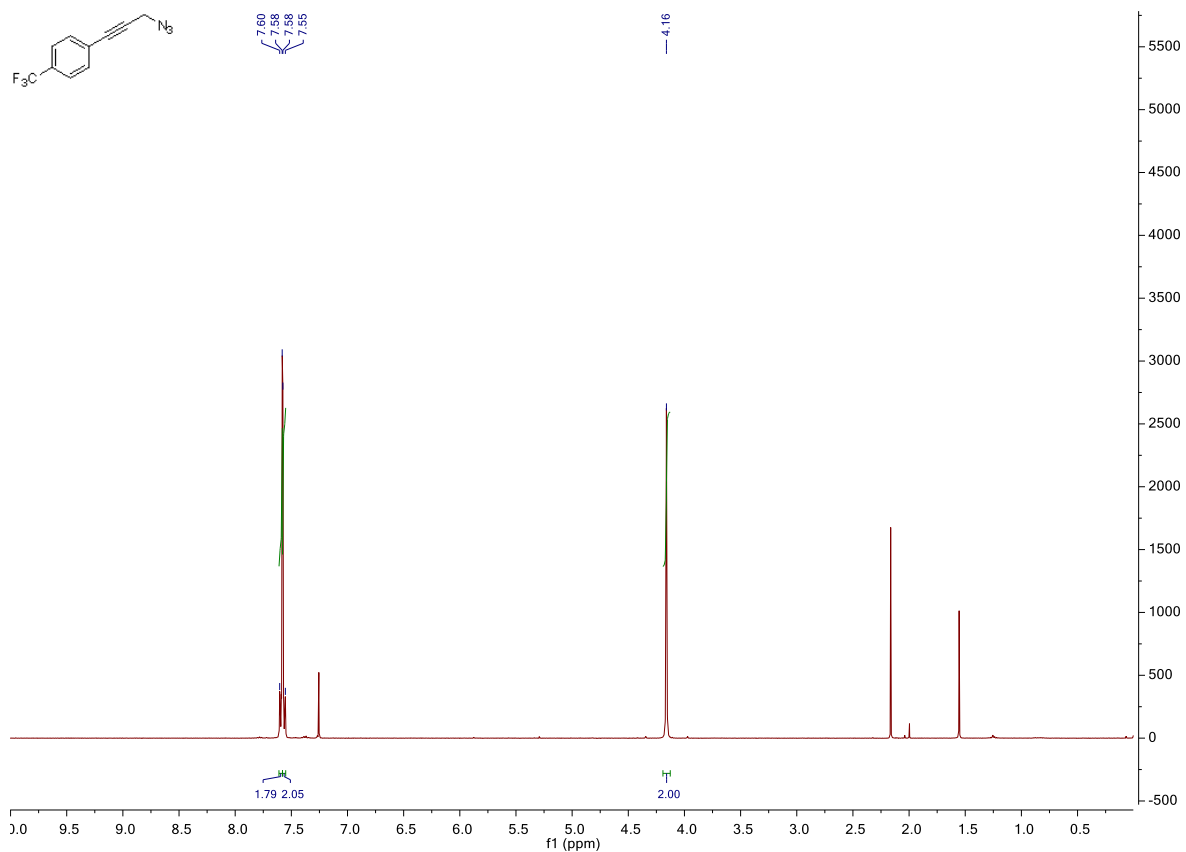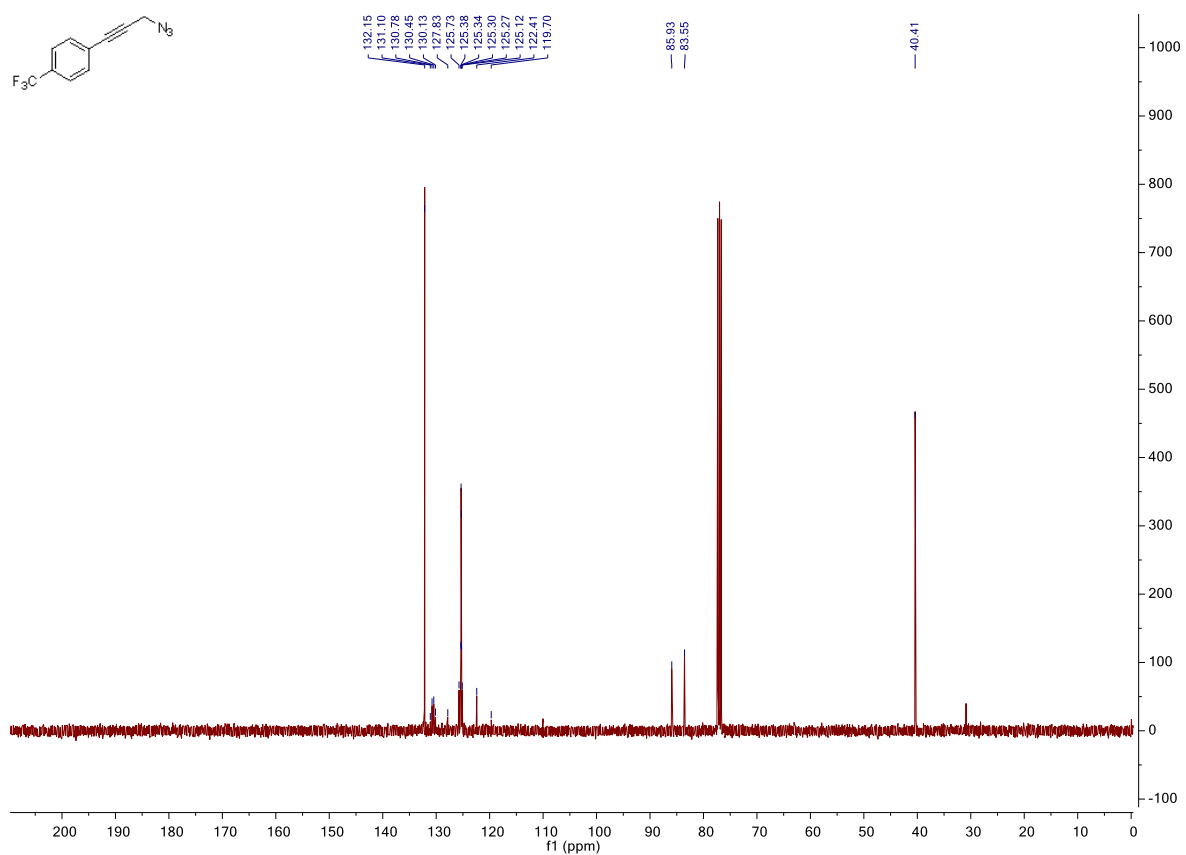

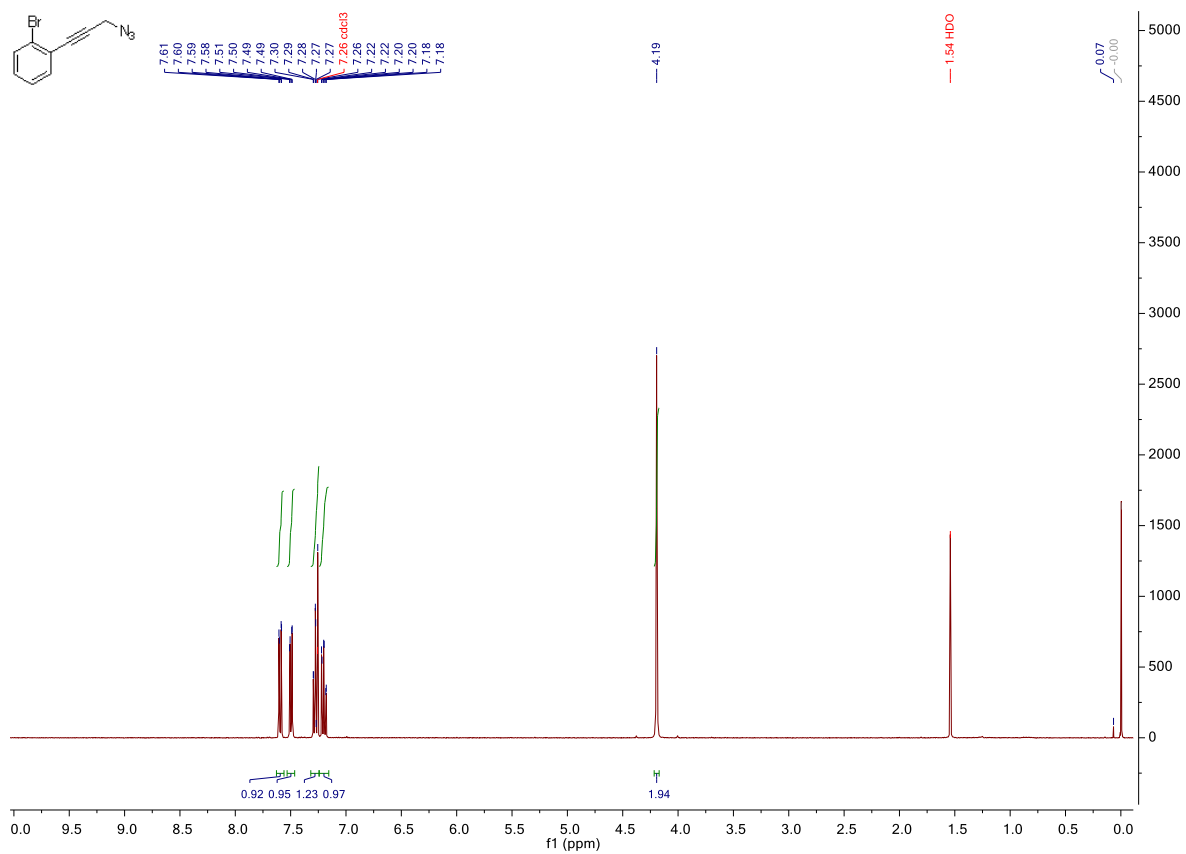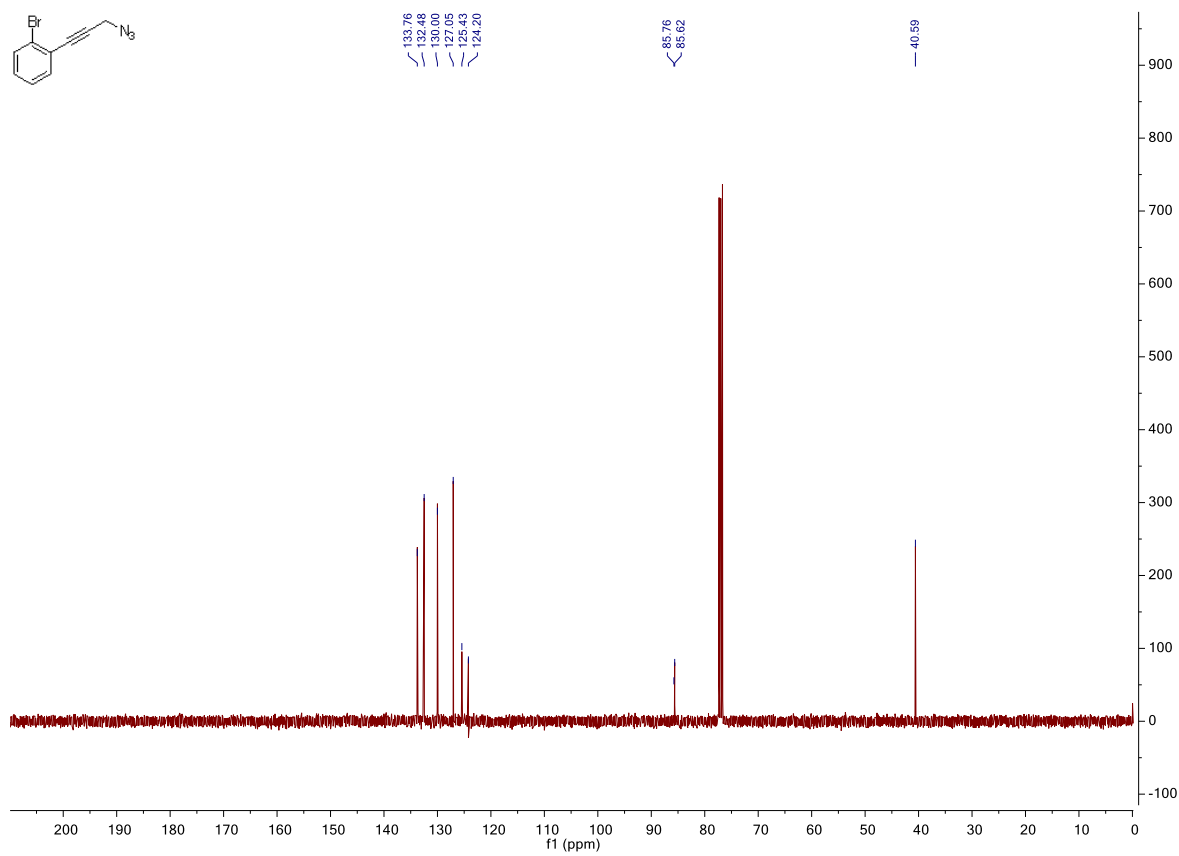

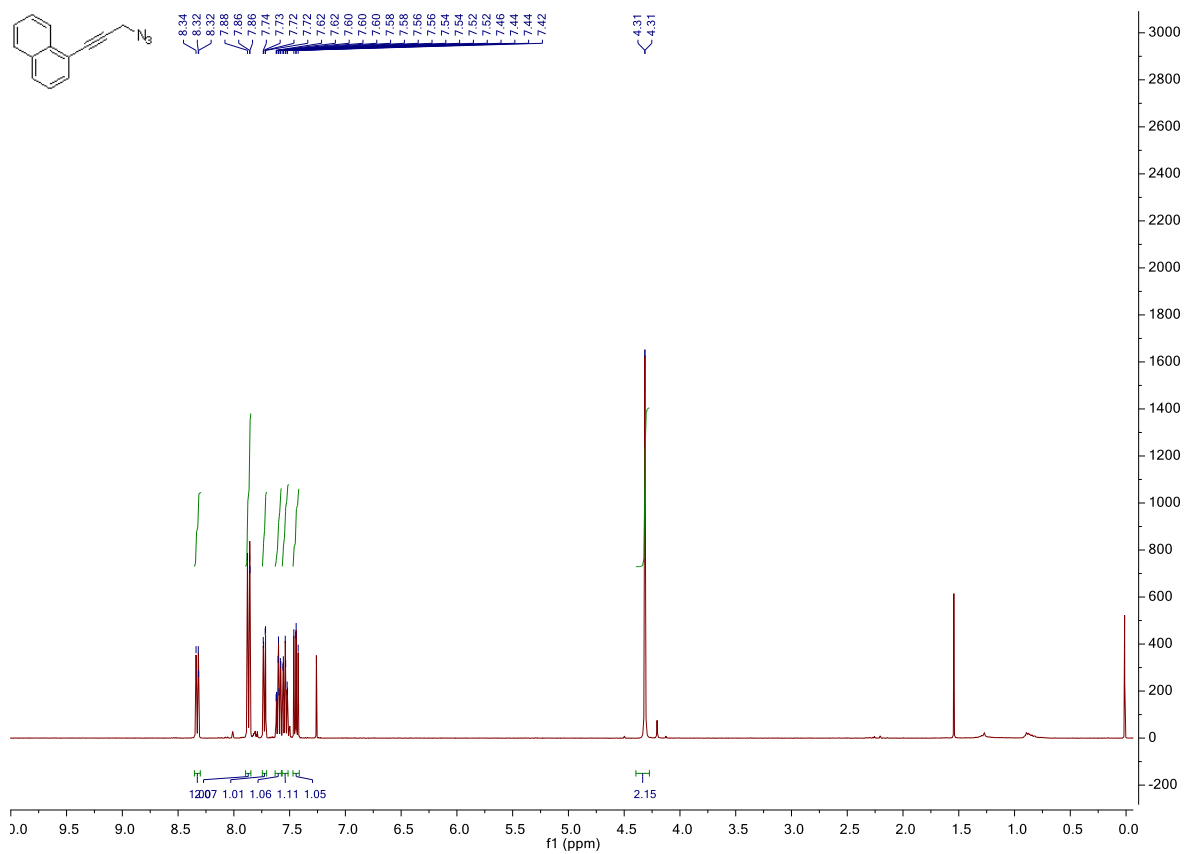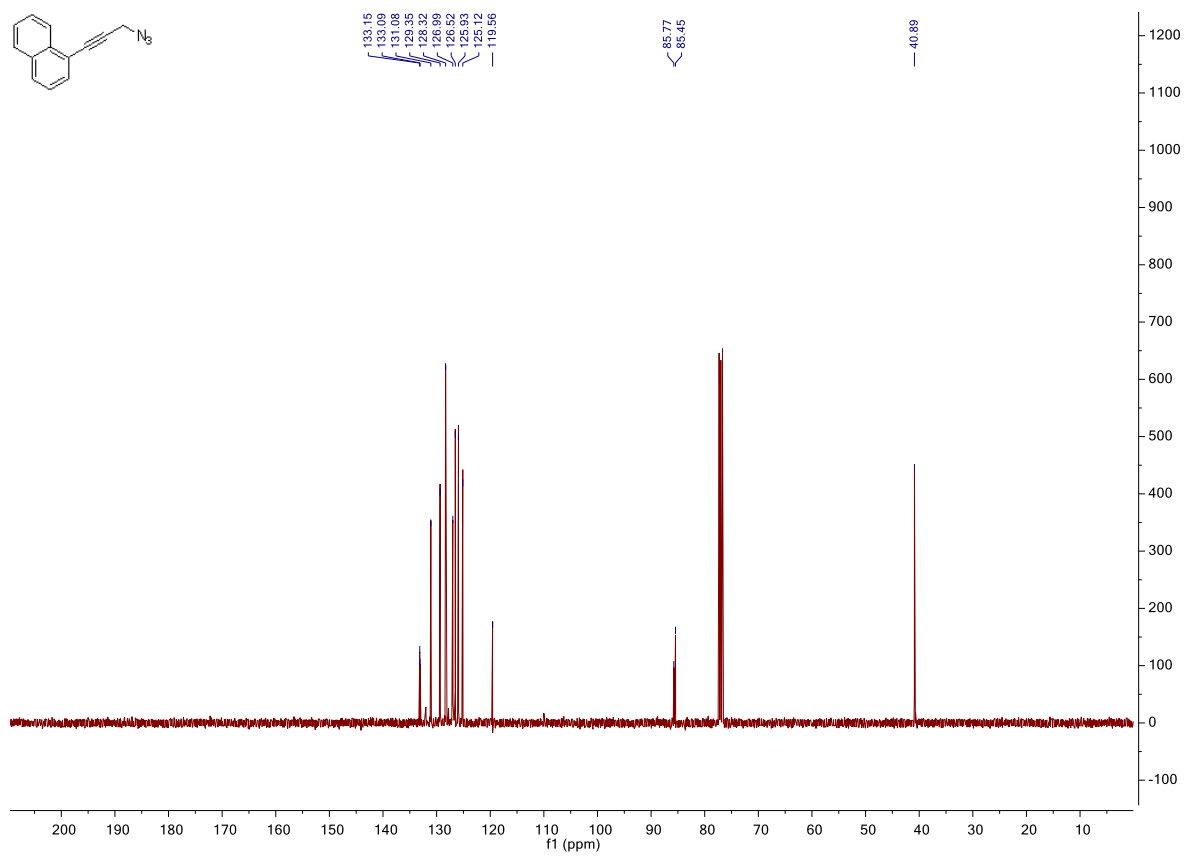

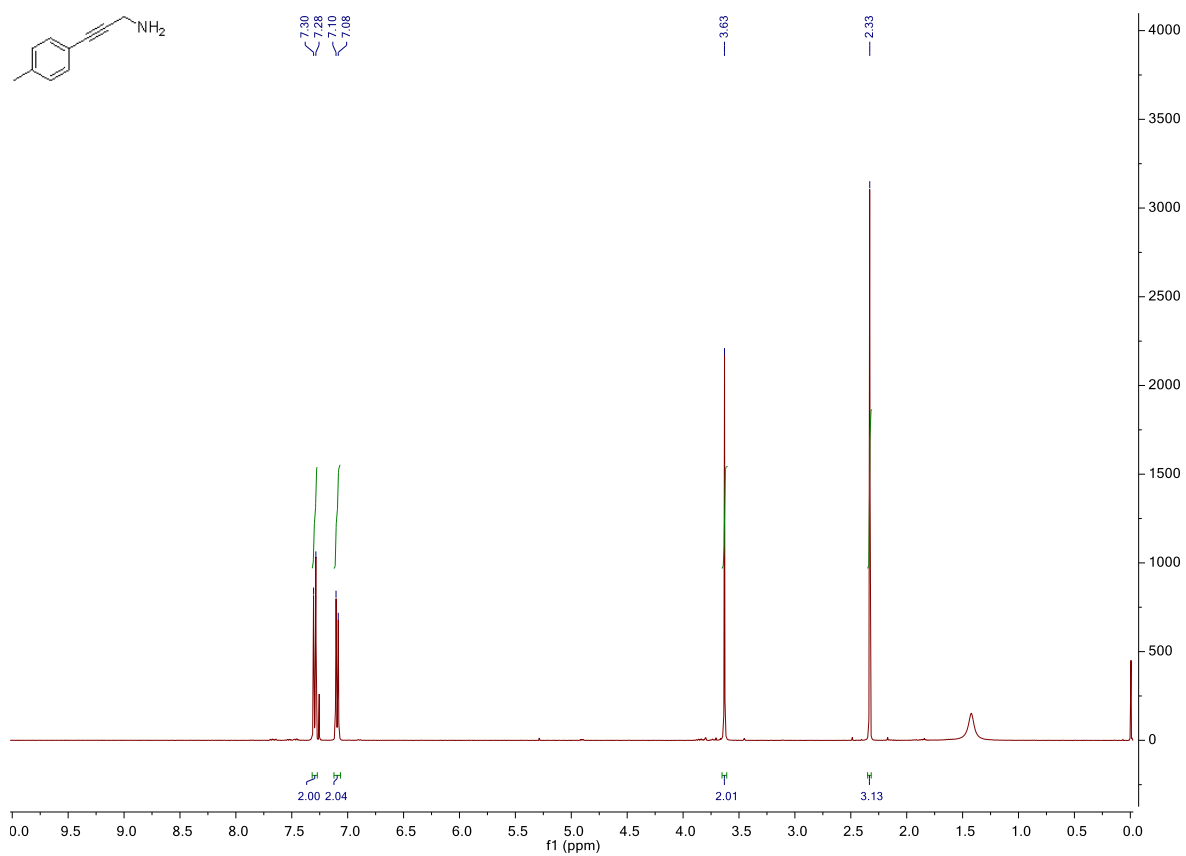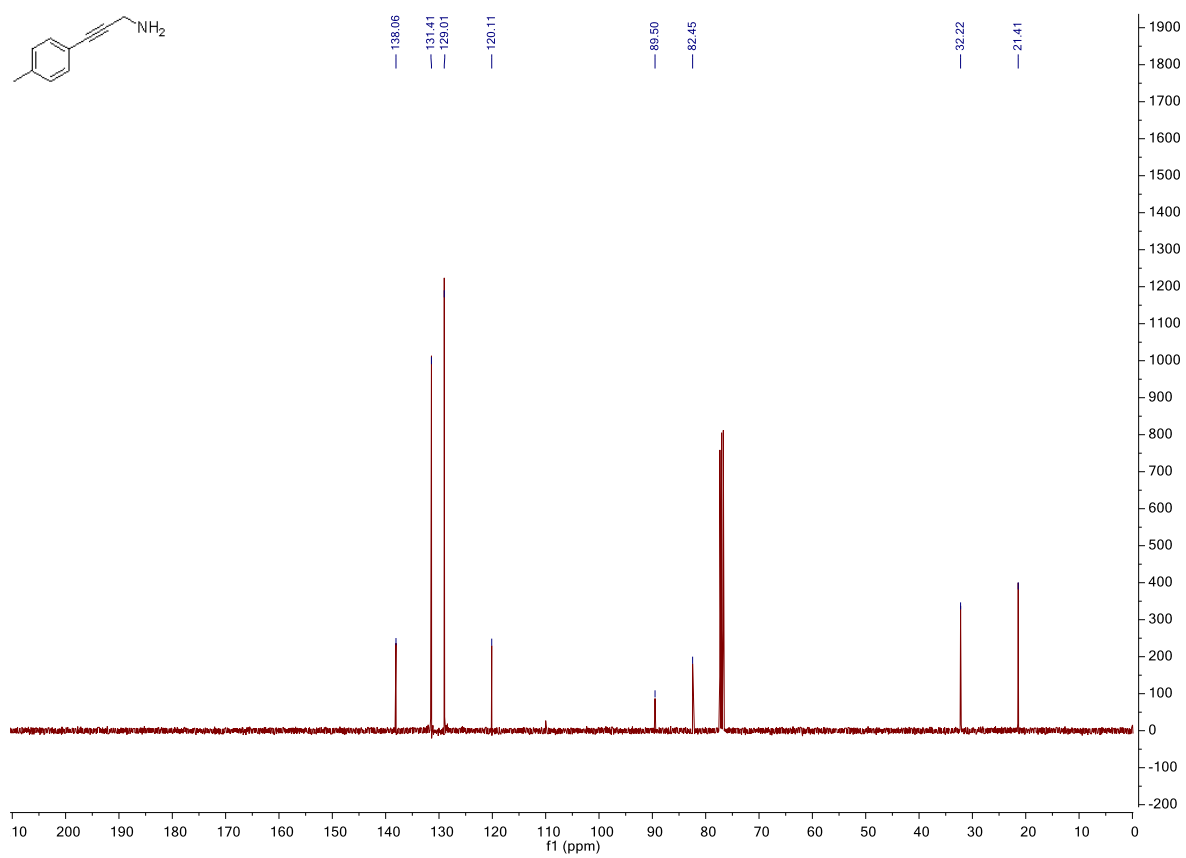

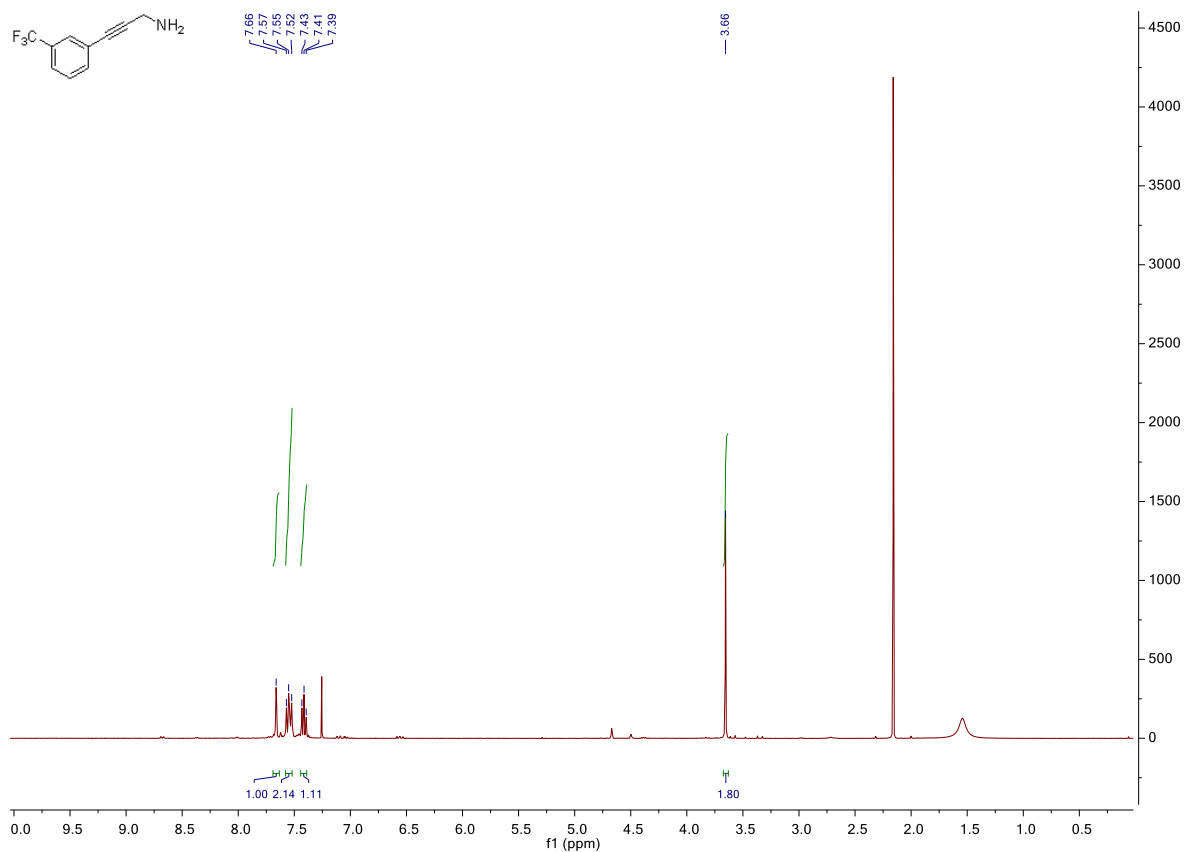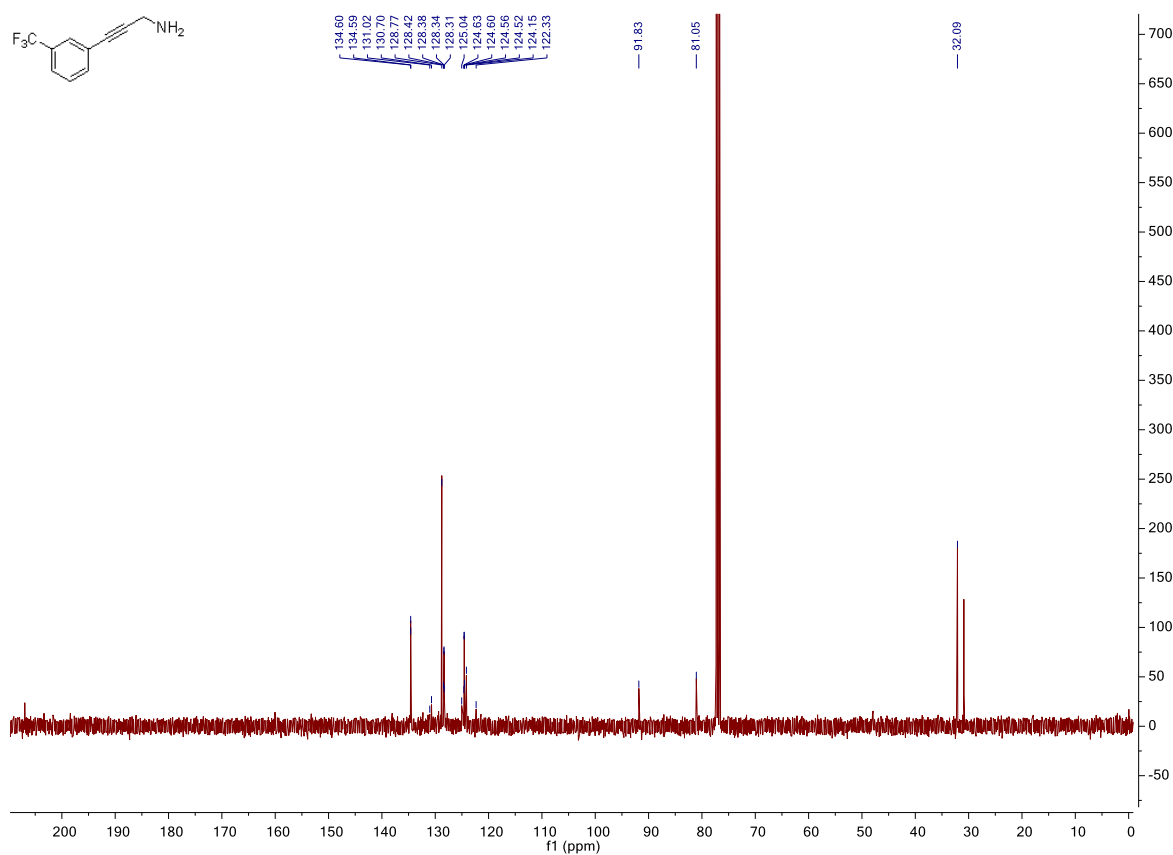

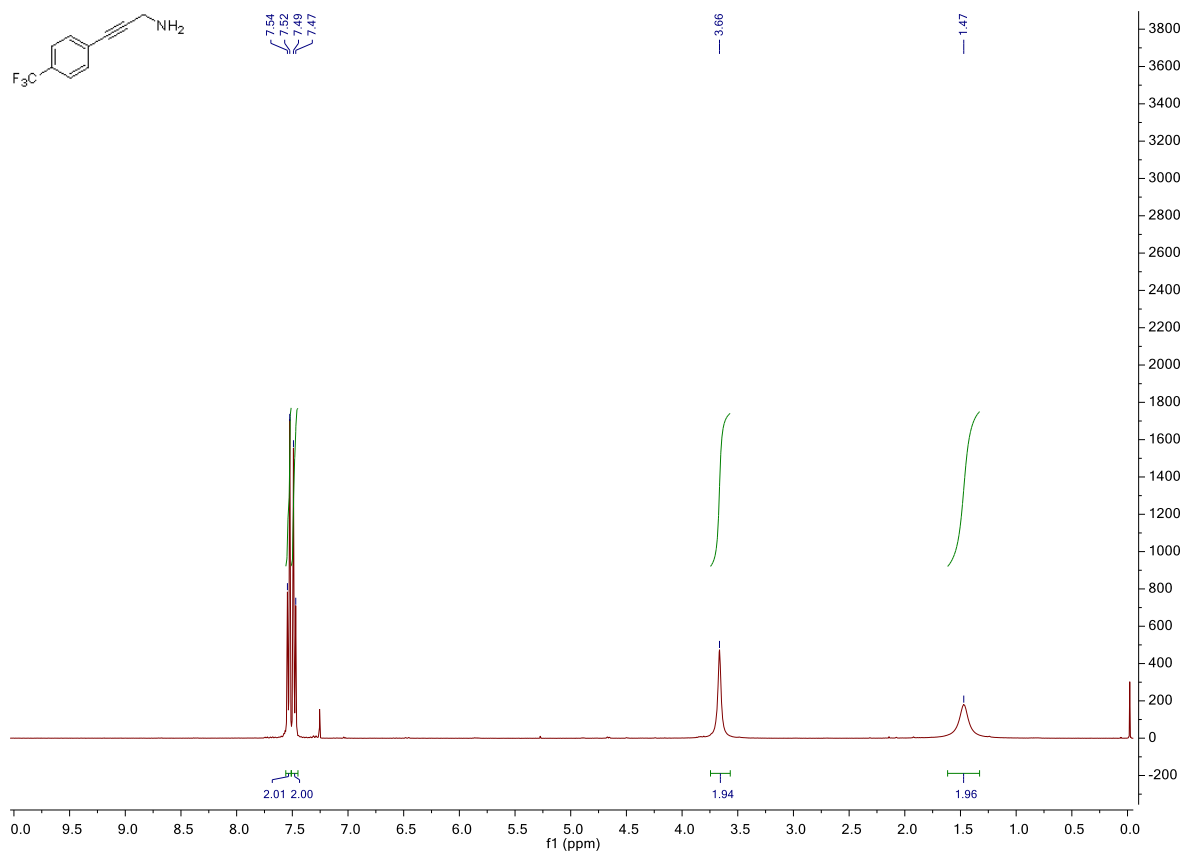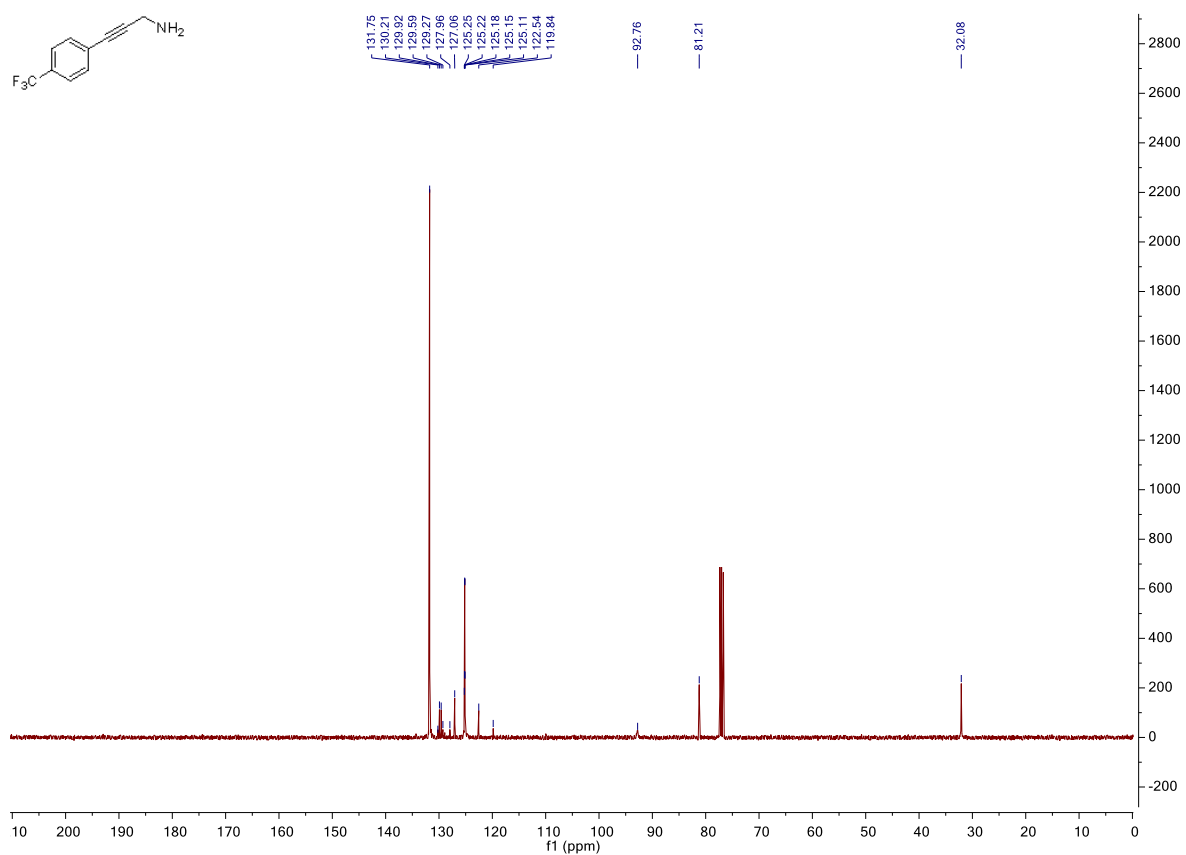

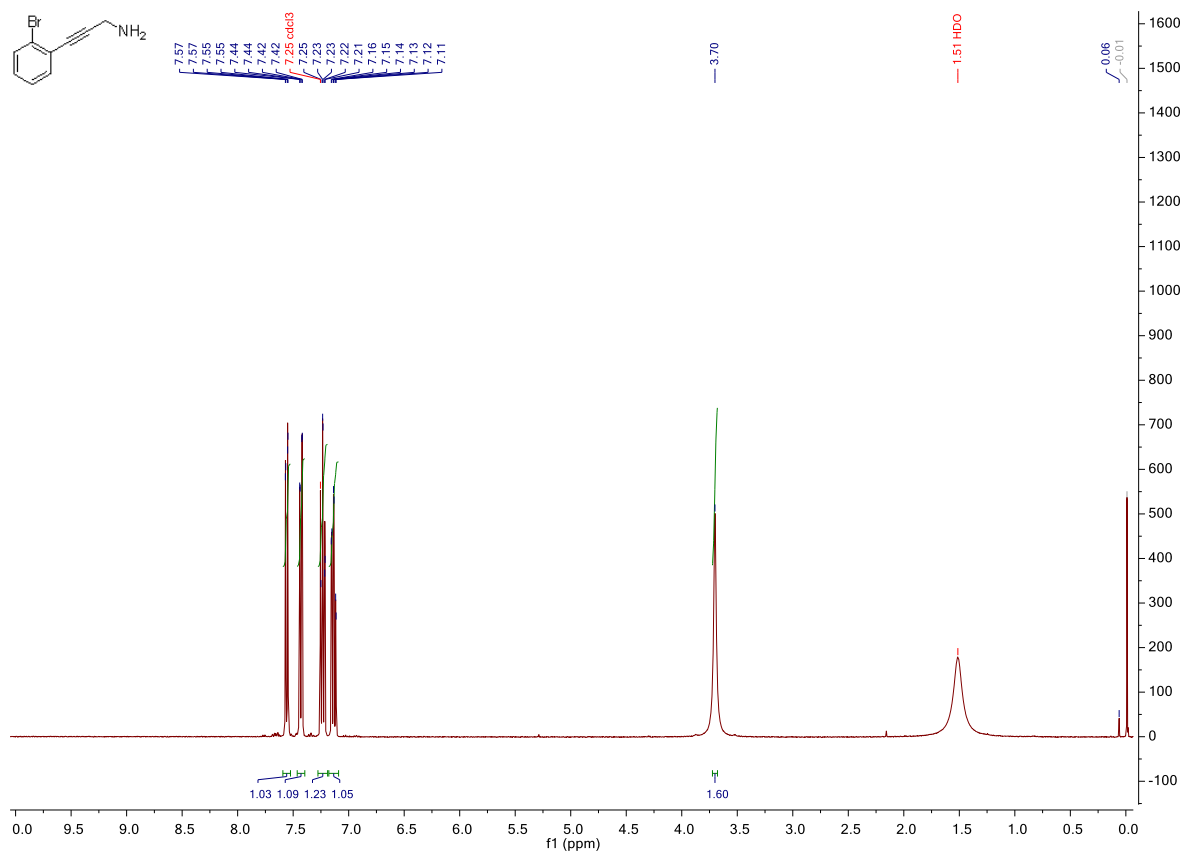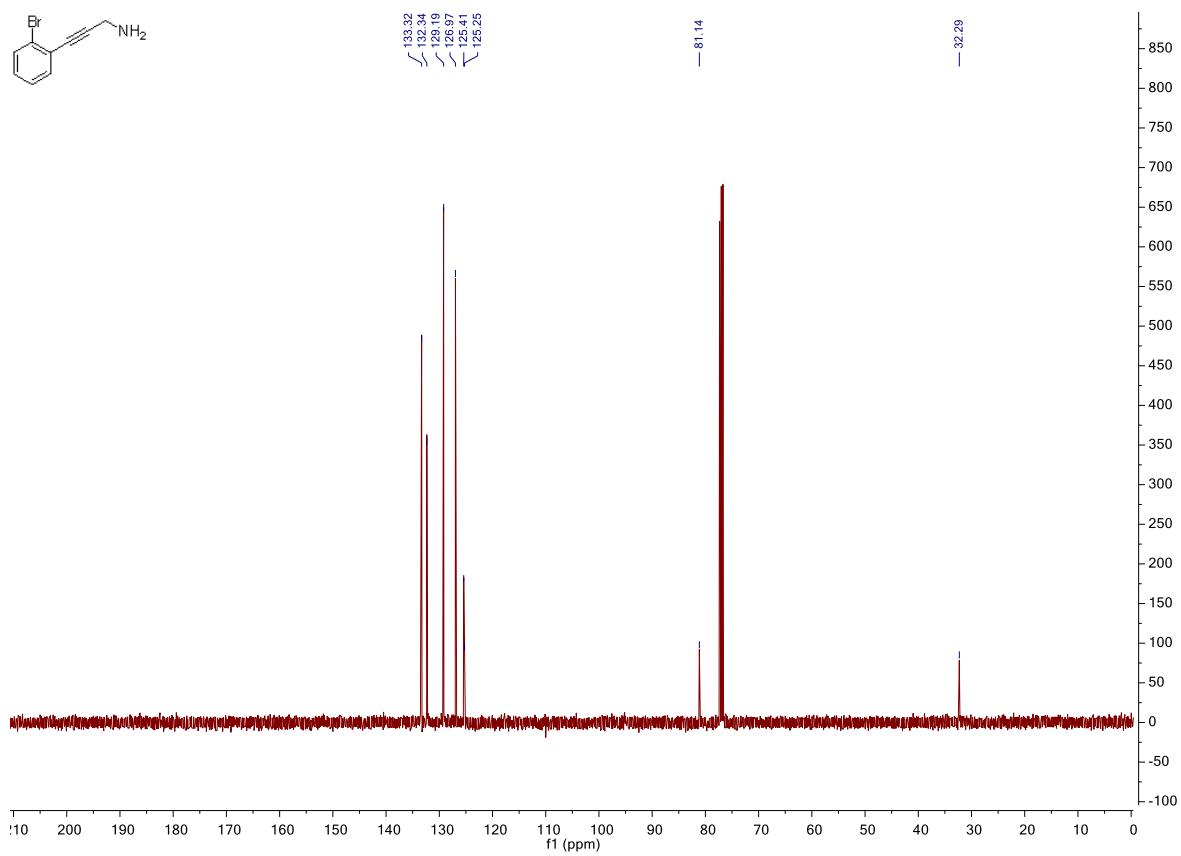

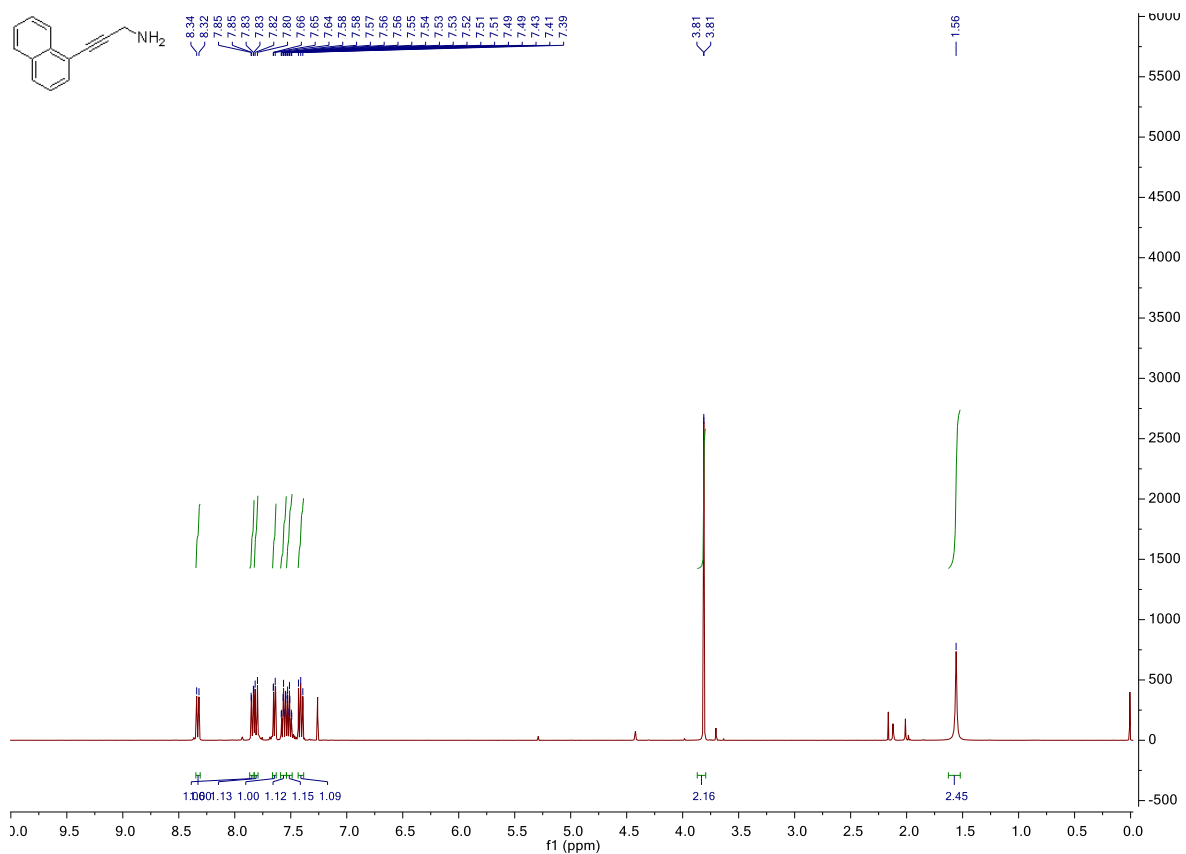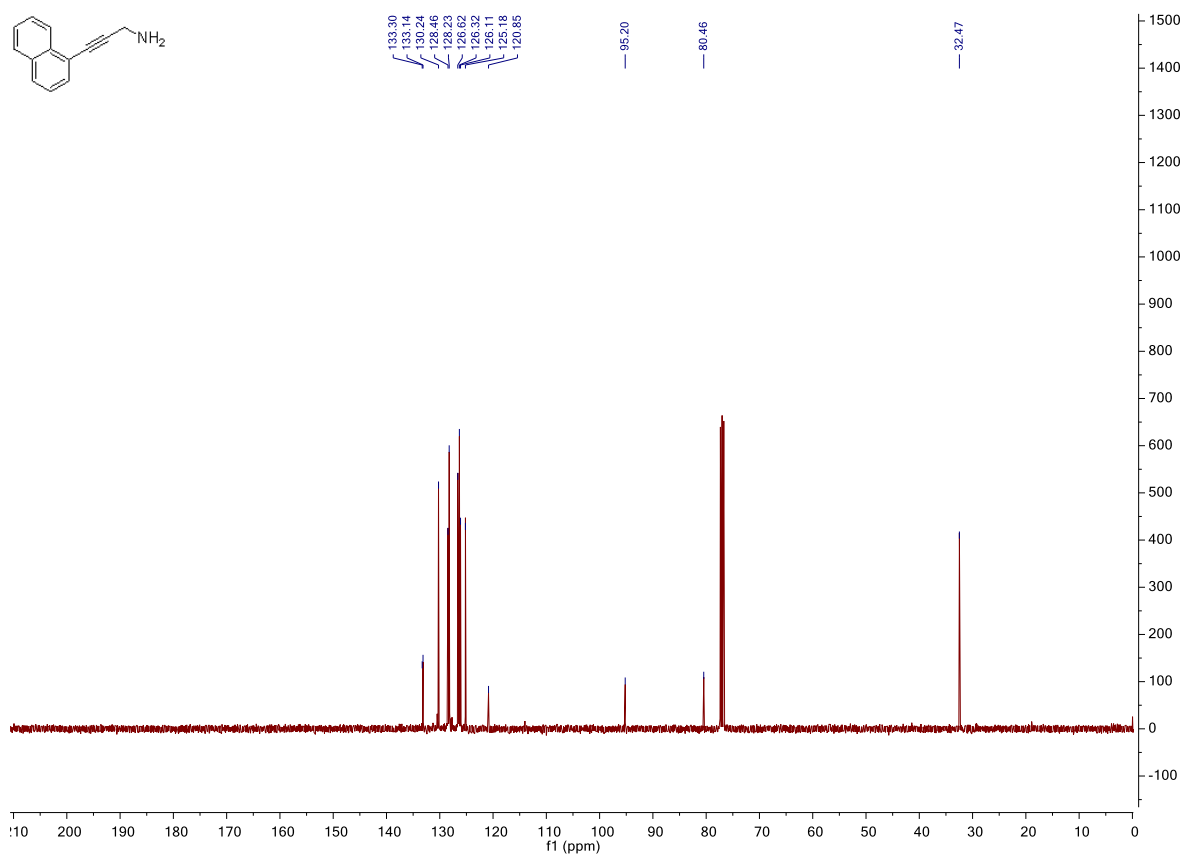



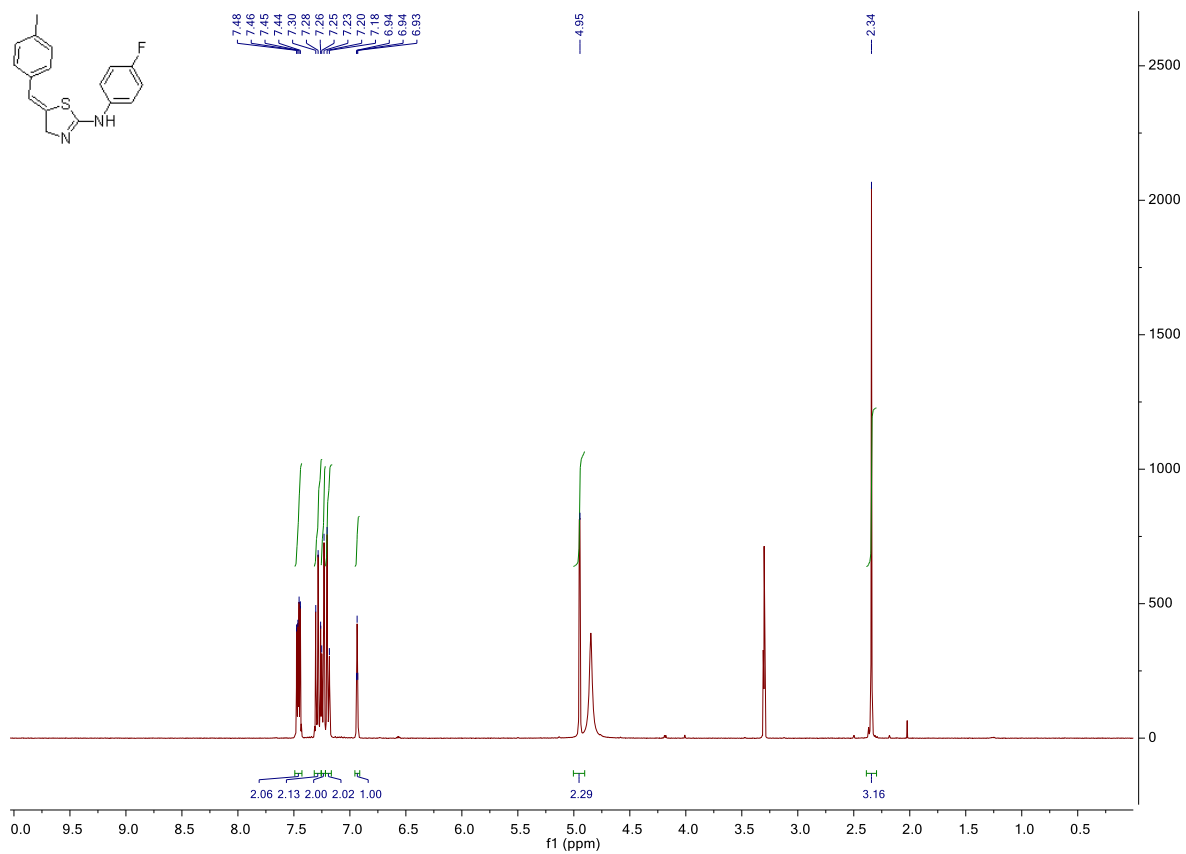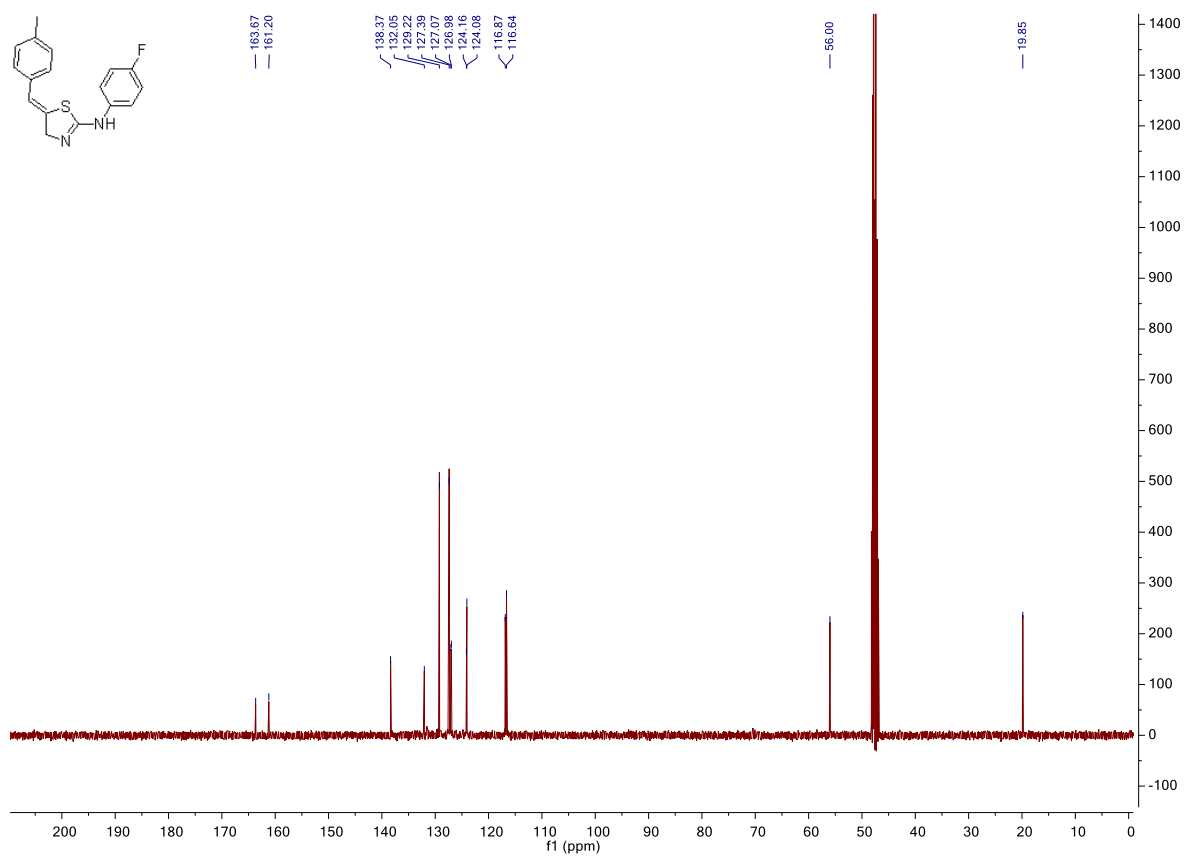

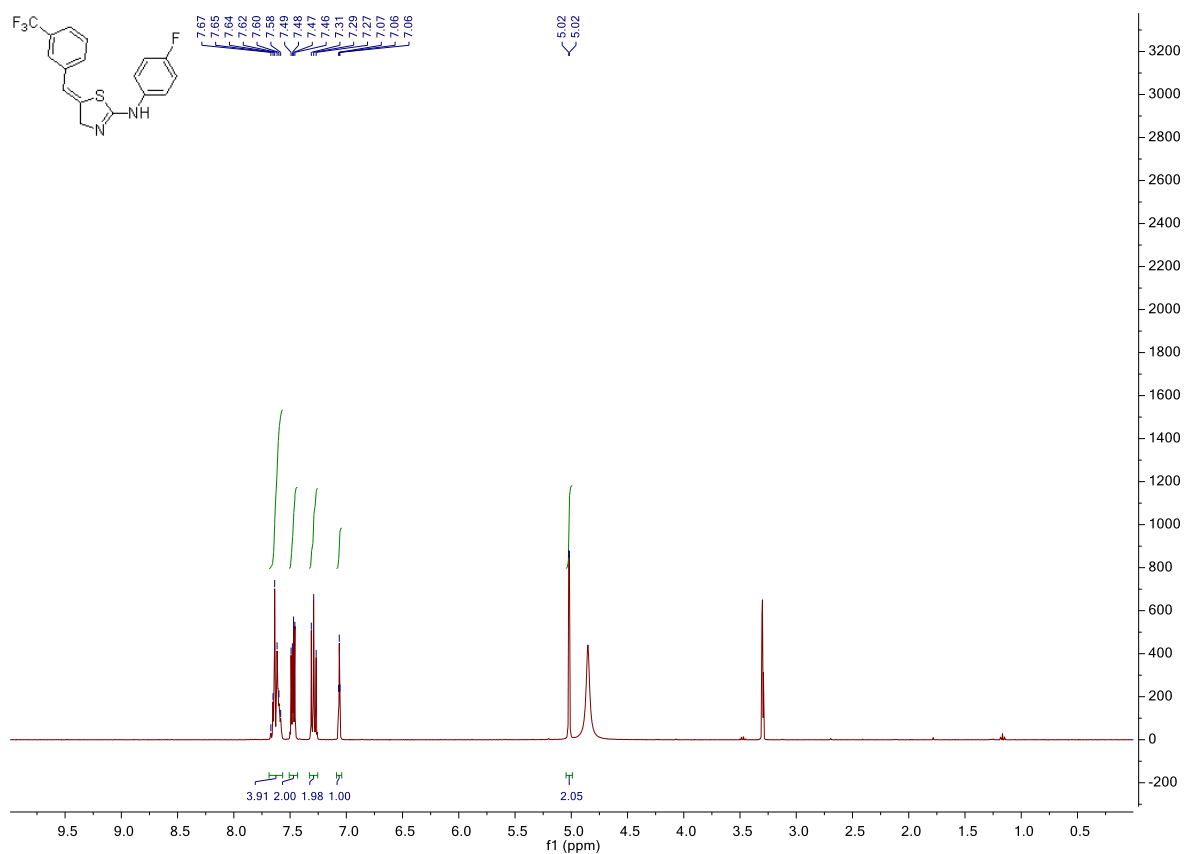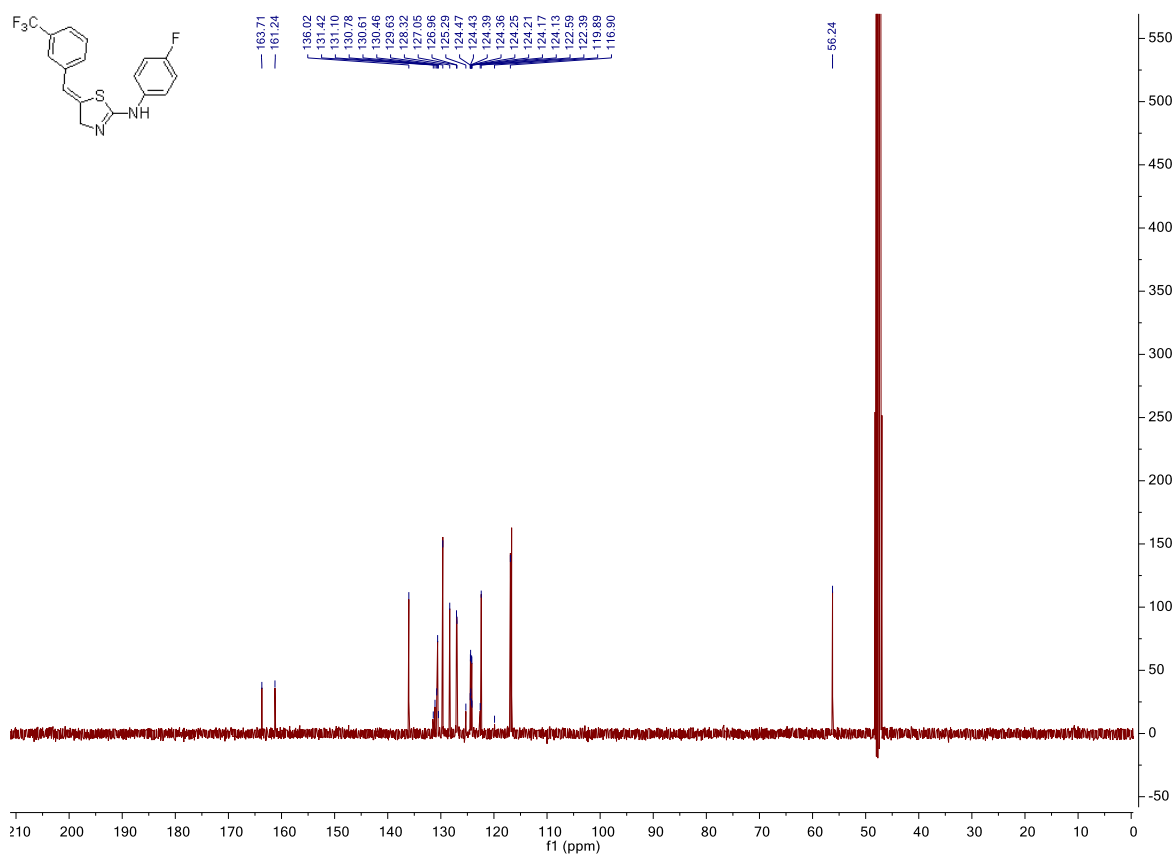

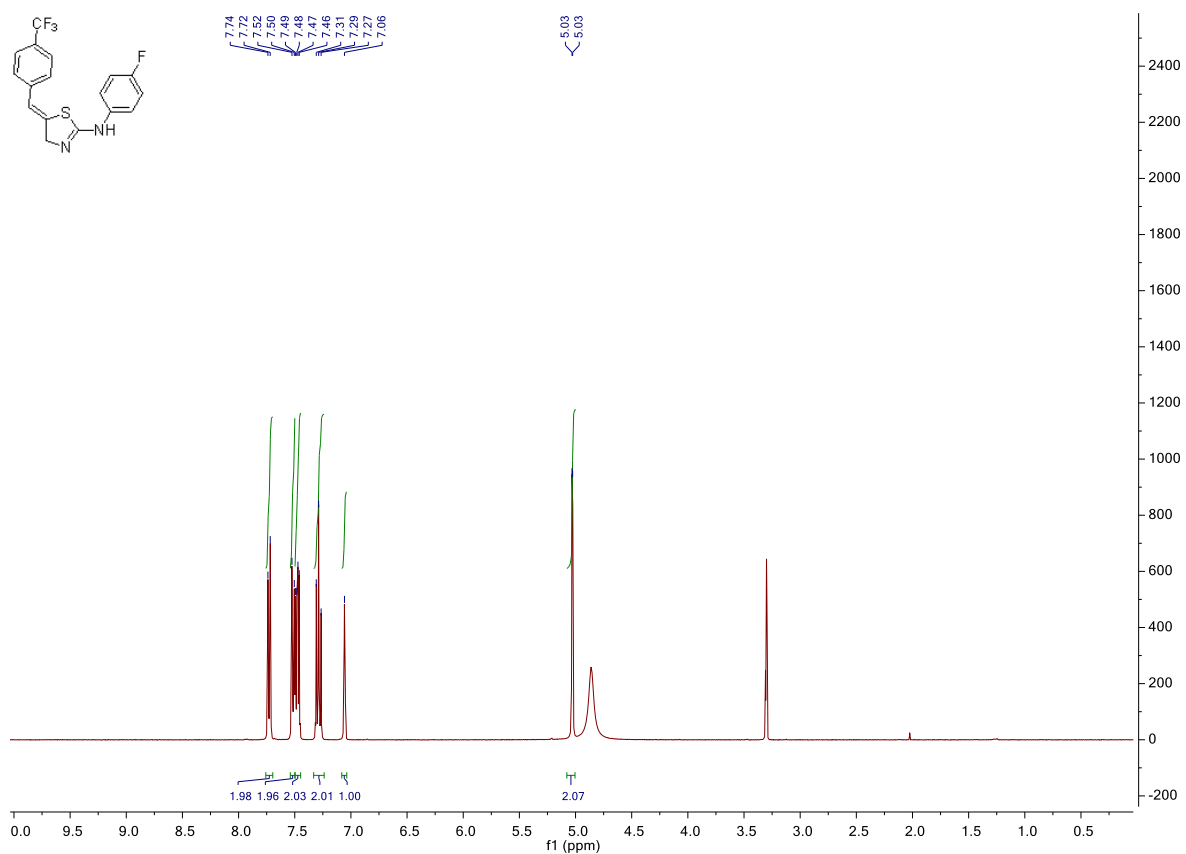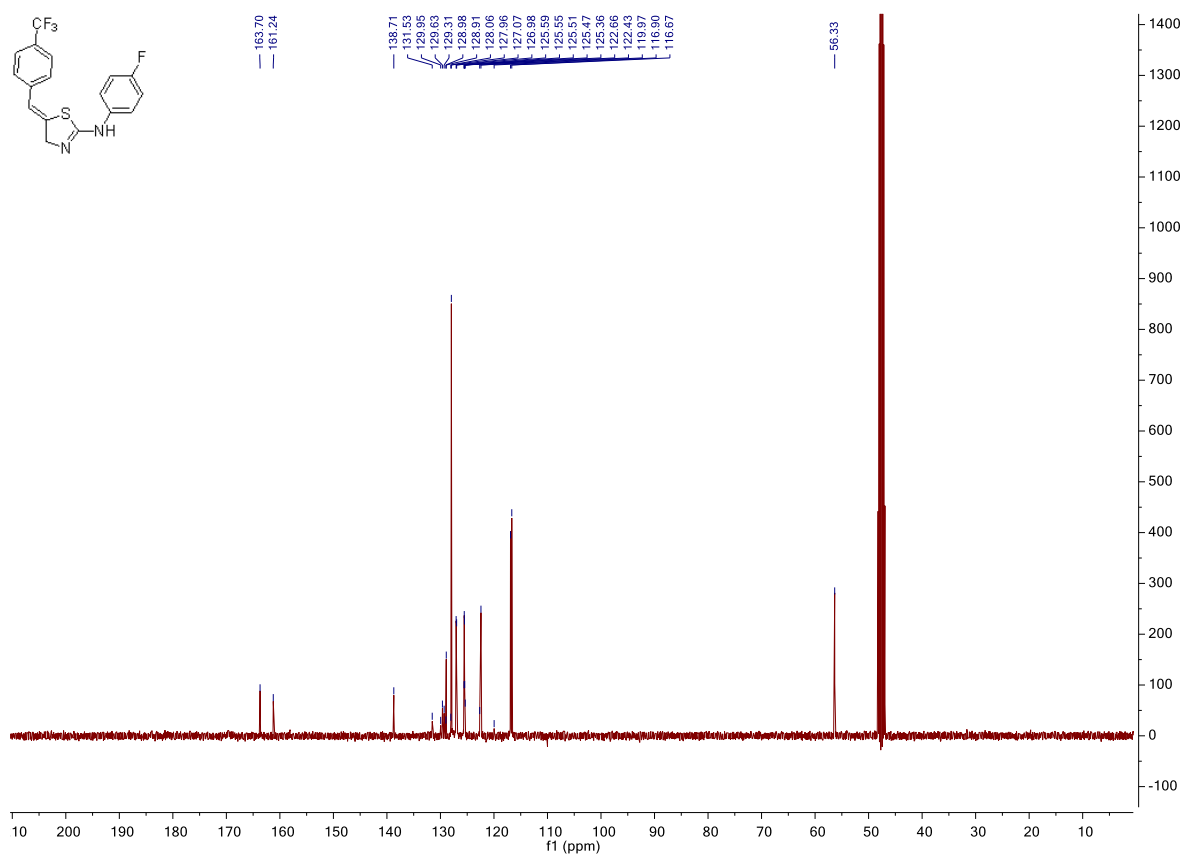

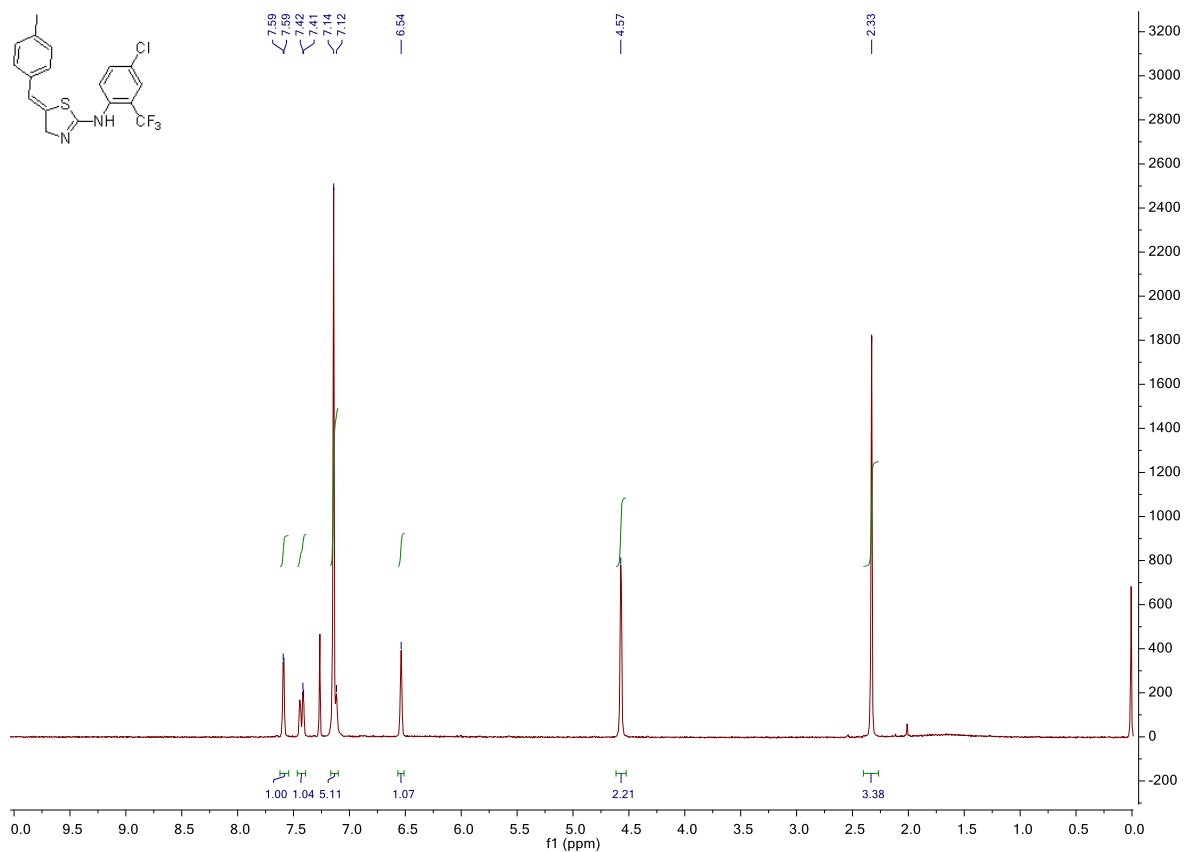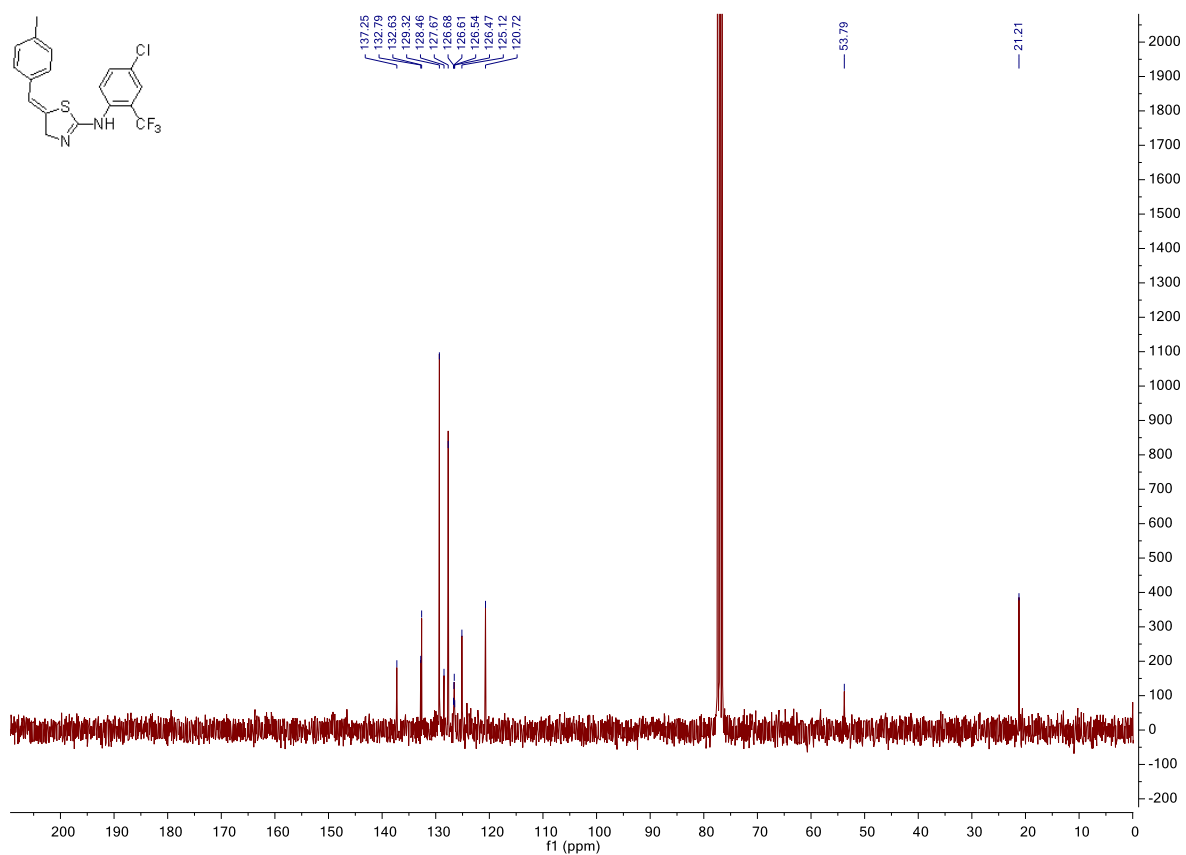

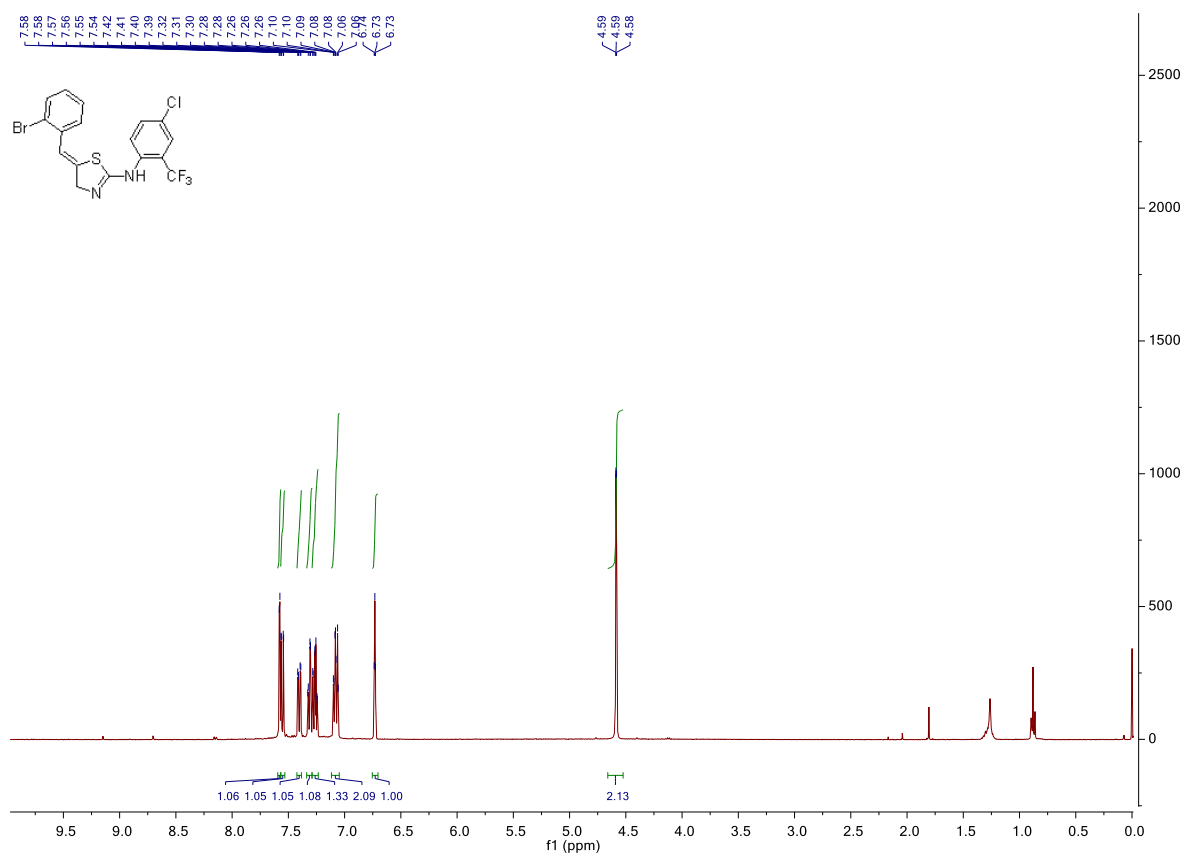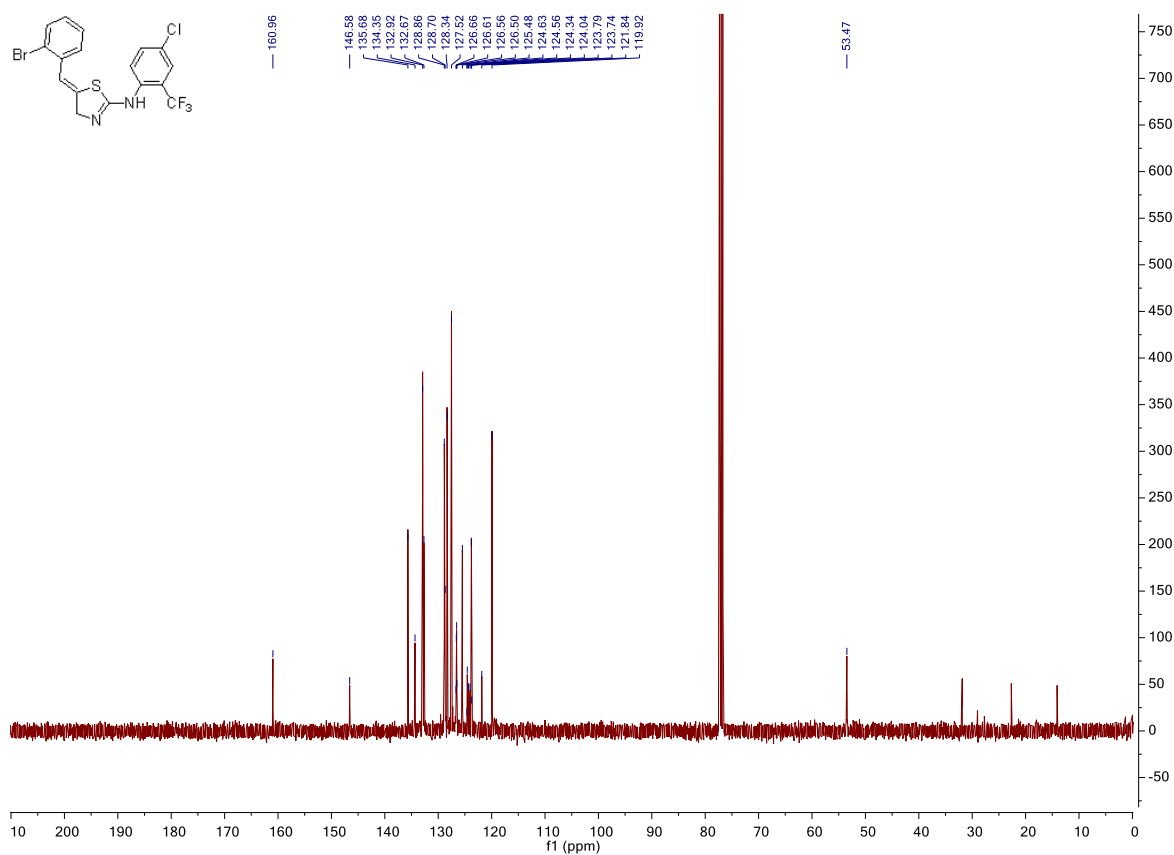

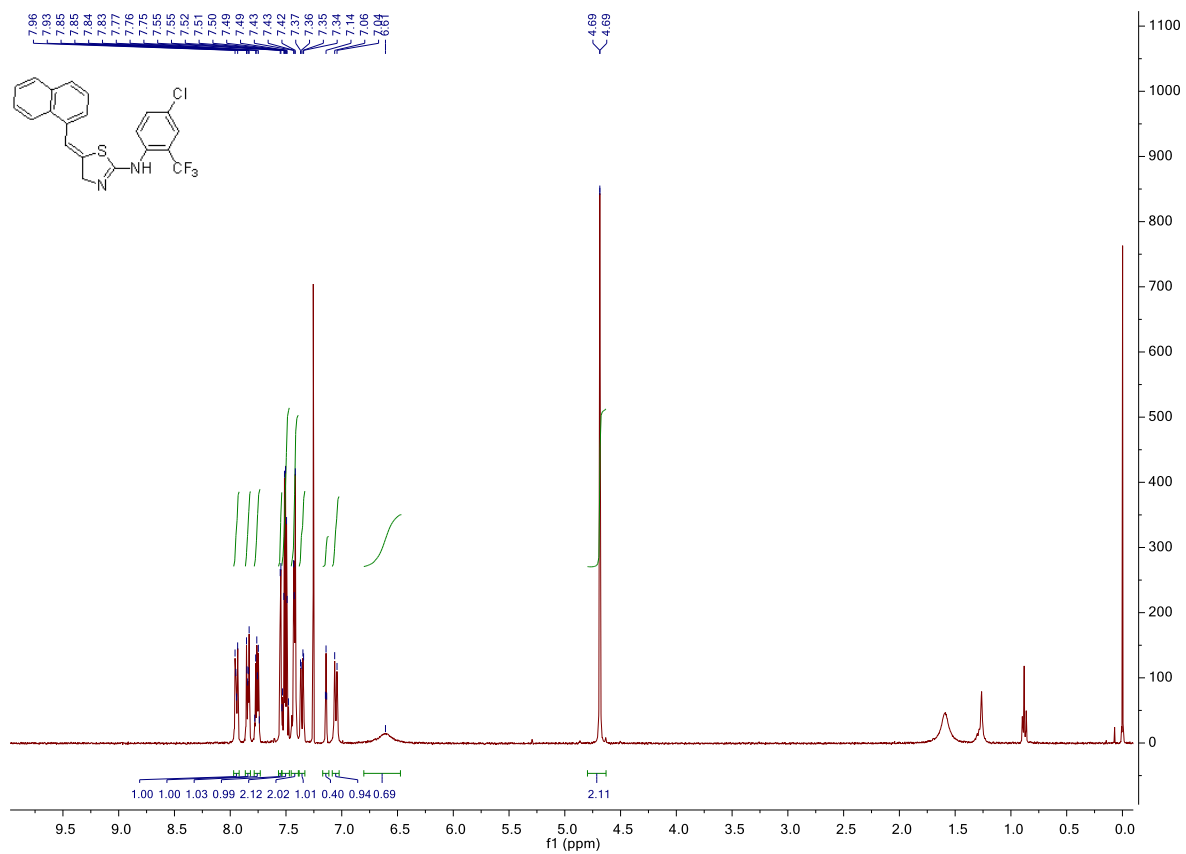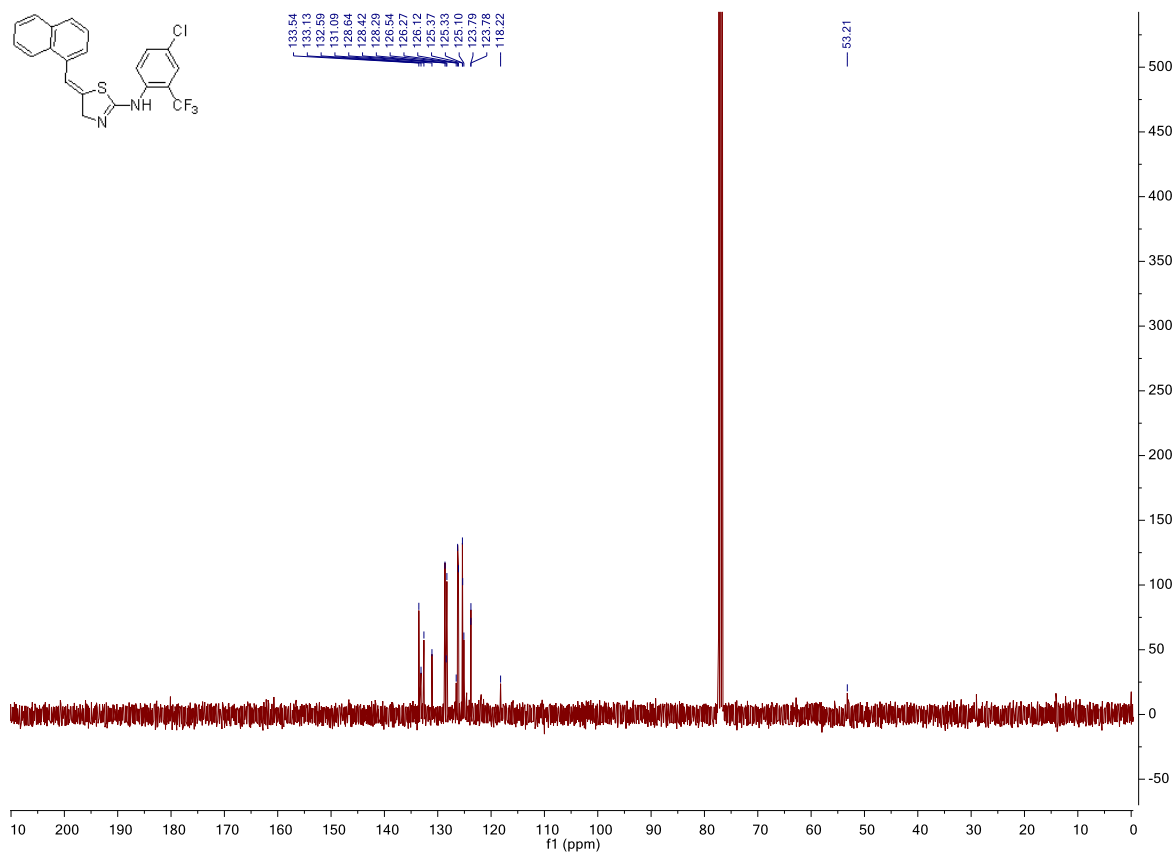

Supplement: s1 [file s1]
